# Supplementary material
Source: Research Square preprint supplement (doi:10.21203/rs.3.rs-8441910/v1)
Supplement: Supplementary file 1 [file 01e43f6c6183cb49d0c343c7.xlsx]

## Sheet: Sheet1
genus	S59	S62	S63	S64
Fusobacterium	196913	148490	135652	238262
Bacteroides	51538.5	36138.4	113711	113626
Phocaeicola	30575.8	28218.8	65236.5	67448.1
unclassified Oscillospiraceae genus	42872.5	66416.4	23669.7	11166.4
Clostridium	18604.4	39208.2	25589.9	11514.5
Butyricicoccus	6349.68	41467.3	9078.05	3351.93
unclassified Lachnospiraceae genus	15948.3	18218.5	12324.7	9255.62
unclassified Eubacteriales genus	14343.4	18783.1	9019.77	4489.4
unclassified Clostridia genus	9359.09	12423.7	7899.02	4709.02
unclassified Bacteroidaceae genus	5969.73	4808.8	11289.2	9568.92
Parabacteroides	5624.41	4168.37	11058.3	10238.8
unclassified Erysipelotrichaceae genus	8126.07	4065.74	9778.38	3120.41
unclassified Bacteria genus	6216.95	5982.8	5994.78	5636.85
Peptacetobacter	5457.57	11849.7	2639.03	3508.61
Mediterraneibacter	6868.71	7393.49	5522.73	3205.55
Faecalibacterium	9788.6	3430.55	6466.43	1411.92
Sutterella	2114.14	2339.82	8797.09	7610.15
Prevotella	3131.21	2703.63	7524.27	6403.79
unclassified Bacteroidales genus	4042.91	2520.69	6605.61	6482
unclassified Bacillota genus	5720.99	7767.65	3686.51	1940.2
Ruminococcus	6337.73	5873.21	3334.66	1580.43
Cetobacterium	5317.42	3667.32	2693.09	5088.4
Eubacterium	4759.2	3661.17	4931.28	2674.8
Massilicoli	1418.23	11652.8	1687.73	1088.04
Blautia	4408.66	5010.43	4079.35	1402.42
Anaerotignum	4093.69	4669.23	3564.26	2402.74
Anaerofilum	2361.52	6430.46	3401.57	683.96
Dorea	3440.9	2910.39	2726.76	2702.51
Thomasclavelia	3459.26	3938.58	2831.62	1493.2
Faecalicatena	3517.43	3483.05	3449.67	906.275
Clostridioides	2204.64	4942.74	2209.76	1553.48
Streptococcus	1362.82	1089.46	1701.38	5026.7
Peptoclostridium	2011.97	4655.35	993.76	1332.16
Gemmiger	2296.54	2752.78	2550.09	1130.04
Massiliimalia	3484.63	4131.11	381.06	145.65
Leptotrichia	2029.9	1973.93	1533.7	2160.5
Pseudoflavonifractor	2291.49	3290.4	1543.58	437.32
Longicatena	2600.44	1082.69	2864.84	898.09
Absiella	2442.09	1200.14	2513.01	874.505
Flavonifractor	2133.76	2543.08	1623.59	509.49
Anaerobiospirillum	882.99	1017.43	2128.92	2304.99
Oscillibacter	1967.24	2491.1	1479.76	365.55
Lachnoclostridium	1619.6	1863.85	1546.56	1244.44
Hymenobacter	2476.47	2220.35	810.85	659.81
Coprococcus	2068.67	2301.58	1228.86	553.25
Agathobaculum	1545.67	2459.64	1167.99	631.125
Pseudomonas	2117.35	2294.83	851.98	535.435
Holdemania	4484.64	430.95	534.82	339.08
Helicobacter	766.8	1467.25	2016.89	1214.53
Candidatus Faecousia	1702.16	2648.14	725.06	192.98
Paraprevotella	794.89	568.75	1776.79	1947.51
Fournierella	1246.63	1183.28	1496.13	888.535
Alistipes	856.58	525.85	1745.27	1621.9
unclassified Clostridiaceae genus	1353.37	1684.65	967.275	419.565
Amedibacterium	950.96	840.09	1895.45	639.96
Lawsonibacter	716.04	826.15	713.66	1789.2
unclassified Muribaculaceae genus	768.88	670.77	1283.34	1300.13
Enterocloster	1199.2	1441.06	942.655	429.425
Ruthenibacterium	1151.71	1722.87	911.115	156.625
Anaerotruncus	1548.16	1063.46	1011.85	192.445
Amedibacillus	928.4	567.13	1757.28	386.47
Enterococcus	659.57	1238.71	814.155	892.735
Roseburia	1153.83	1415.36	643.08	299.365
Desulfovibrio	632.21	994.94	1156.69	722.875
Paenibacillus	1015.94	912.01	1089.89	474.69
Subdoligranulum	1252.41	1281.54	650.535	220.52
Escherichia	687.16	498.48	1267.48	818.84
Dysosmobacter	796.4	1596.86	570.795	292.42
Cellulomonas	32.85	187.13	620.48	2235.3
Intestinimonas	954.53	1207.87	738.245	172.705
Streptomyces	567.79	456.57	775.43	1200.55
Tyzzerella	775.52	613.92	995.41	581.58
Vibrio	640.41	595.49	897.41	808.885
Staphylococcus	800.67	373.35	831.505	900.205
unclassified Bacteroidota genus	523.17	677.83	987.91	710.91
Tannerella	455.37	259.25	1293.95	867.72
unclassified Desulfovibrionaceae genus	245.58	108.68	1814.77	547.175
Moorella	967.94	1305.49	315.8	38.445
Treponema	1250.64	469.18	618.195	182.96
Psychrobacter	1280.91	787.79	285.87	151.945
Klebsiella	329.5	280.44	932.5	936.455
Candidatus Amulumruptor	333.24	840.2	693.235	574.585
Salmonella	846.79	411.43	667.915	506.485
Paeniclostridium	380.23	1029.05	475.645	511.775
Romboutsia	918.12	606.29	371.43	469.81
Coprobacillus	718.26	757.94	664.955	193.23
Mediterranea	448.98	377.39	635.44	820.37
Butyricimonas	406.45	279.38	806.405	780.405
unclassified Planctomycetota genus	348.76	405.03	740.545	745.025
unclassified Porphyromonadaceae genus	542.85	496.49	602.115	596.95
Hespellia	667.99	736.74	680.3	85.395
Butyrivibrio	630.08	781.78	424.865	304.785
Fusicatenibacter	519.75	590.52	506.065	465.545
Intestinibacter	352.94	527.2	412.705	735.01
Hungatella	544.76	757.4	394.365	318.92
Barnesiella	229.62	223.14	864.925	695.06
Bacillus	652.8	679.49	500.575	163.48
unclassified Bacilli genus	857.38	372.81	352.235	354.96
Succinatimonas	379.65	367.74	315.61	818.435
Holdemanella	524.08	481.87	718.345	139.75
Kaistella	1263.53	217.15	226.51	137.64
Bariatricus	777.52	781.54	137.11	43.4
unclassified Fusobacteriota genus	398.24	101.38	215.71	917.19
Campylobacter	332.26	635.17	356.05	278.635
Paraclostridium	505.55	300.79	318.32	448.46
unclassified Fusobacteriaceae genus	489.68	386.21	217.665	353.04
unclassified Christensenellaceae genus	505.84	610.64	143.635	170.33
unclassified Paludibacteraceae genus	189.9	161.18	596.885	454.29
Deinococcus	615.61	411.2	206.73	152.25
unclassified Peptostreptococcaceae genus	210.86	735.1	194.38	198.96
Lacrimispora	385.16	332.75	291.8	320.74
Xanthomonas	369.52	265.05	260.77	413.57
Anaerostipes	484.3	278.04	323.07	199.835
Polaromonas	640.83	451.55	118.93	51.05
Veillonella	369.4	368.73	296.475	220.845
Bifidobacterium	202.88	237.36	439	371.925
Megasphaera	235.15	742.03	136.34	129.445
Allobaculum	310.22	454.05	284.985	169.69
Flintibacter	216.97	657.09	212.015	131.535
Mucispirillum	135.66	357.34	356.93	366.605
Acetivibrio	434.66	308.13	394.075	60.875
Solobacterium	200.44	172.86	679.365	143.47
Luxibacter	346.84	431.58	354.76	61.17
Merdimmobilis	599.47	426.22	93.585	13.87
Catenibacterium	199.72	204.48	497.87	214.255
Collinsella	163.95	159.19	421.505	370.605
Propionigenium	81.62	96.11	561.85	371.895
unclassified Acidobacteriota genus	160.23	397.73	301.77	250.765
Phascolarctobacterium	231.89	469.92	289.99	87.125
Angelakisella	227.59	374.15	405.35	56.06
Faecalibacillus	495.99	229.1	156.04	163.645
Acutalibacter	364.05	393.18	134.405	71.96
Succinivibrio	113.95	133.36	365.665	318.71
unclassified Tissierellia genus	227.81	207.31	174.265	315.44
Faecalimonas	224.86	481.03	158.285	59.7
Xenorhabdus	242.76	213.77	190.68	276.645
Chryseobacterium	423.76	143.51	208.245	132.98
Eisenbergiella	221.56	352.25	263.615	64.815
Megamonas	270.3	126.45	302.595	188.085
Listeria	200.39	131.92	229.94	325.03
Nitrosophilus	48.58	720.31	95.98	13.505
Anaeromassilibacillus	281	303.97	233.995	48.885
unclassified Alphaproteobacteria genus	382.36	112.09	201.74	163.865
Ruminiclostridium	252.67	354.83	155.56	85.075
Faecalicoccus	281.6	128.96	302.21	134.495
unclassified Prevotellaceae genus	149.59	119.58	281.735	293.46
Duodenibacillus	78.86	68.65	311.835	368.25
Herbaspirillum	209.1	91	124.71	389.49
Coprobacter	112.95	143.87	267.32	289.855
Bordetella	170.45	288.06	231.96	123.165
unclassified Cytophagaceae genus	265.74	283.75	124.375	139.435
Actinomyces	316.3	35.28	102.21	324.07
Drancourtella	190.99	256.64	139.965	189.75
Odoribacter	133.21	110.3	273.97	256.4
unclassified Lentisphaeria genus	245.17	215.73	147.125	146.165
Negativibacillus	166.85	307.35	216.375	58.62
Terasakiella	232.9	233.63	131.34	150.17
Peptostreptococcus	147.71	140.73	177.265	281.28
unclassified Eubacteriaceae genus	332.84	254.87	102.23	42.58
Candidatus Epulonipiscium	46.54	587.3	56.765	18.64
Agathobacter	219.62	267.21	118.95	95.855
Merdibacter	173.77	168.41	315.78	43.605
Acidaminococcus	80.68	115.06	237.615	256.625
Porphyromonas	146.92	47.55	272.04	216.635
Parvimonas	111.88	174.17	171.33	225.5
Ilyobacter	47.89	30.38	119.355	480.91
unclassified Burkholderiaceae genus	91.99	151.9	216.485	212.85
Intestinibacillus	76.82	457.09	106.085	29.095
Vallitalea	188.13	351.19	111.175	16.38
Sellimonas	195.86	268.48	164.3	37.24
Neglectibacter	391.48	161.2	68.27	43.65
Muricomes	181.7	177.38	217.605	84.785
Pseudoleptotrichia	198.96	115.91	108.87	232.985
Candidatus Fimimorpha	391.03	115.62	91.485	54.865
unclassified Erysipelotrichia genus	158.37	93.66	344.39	49.525
Bianquea	166.42	97.03	240.75	137.555
Desulfotomaculum	601.81	27.32	0.65	0.115
Faecalitalea	231.85	112	227.275	53.1
Tepidibacter	165.55	201.08	142.055	104.47
Candidatus Onthosoma	99.58	375.72	99.105	34.58
Anaerobutyricum	198.4	242.44	130.75	33.735
Candidatus Stoquefichus	139.71	268.15	146.29	42.075
unclassified Spirochaetia genus	122.98	39.57	380.36	50.24
Akkermansia	148.36	79.21	243.355	112.045
Thiomonas	219.06	35	285.65	33.33
Anaerosporobacter	288.29	106.88	71.23	99.405
Sharpea	94.42	187.57	197.805	80.34
Sporanaerobacter	220.61	187.22	137.85	12.77
Terrisporobacter	181.31	212.65	80.19	60.515
Hallella	106.52	261.38	87.385	77.19
Traorella	114.49	80.64	243.94	82.215
Massilimicrobiota	149.72	109	219.65	42.605
Hydrogenoanaerobacterium	175.12	207.28	107.81	30.57
Carnobacterium	117.58	87.62	71.09	243.11
Lactobacillus	190.11	122.88	148.8	52.485
Lachnospira	229.72	131.15	89.88	56.535
Candidatus Arthromitus	352.06	57.29	59.005	35.975
Ligilactobacillus	194.56	162.73	87.06	59.52
Bittarella	111.06	287.8	85.495	18.405
Agarivorans	185.4	186.5	53.795	76.225
unclassified Gammaproteobacteria genus	136.68	67.62	158	138.02
unclassified Spirochaetales genus	106.14	203.81	88.06	95.525
Peptoniphilus	128.64	209.29	83.095	71.485
Mesotoga	109.53	41.16	99.645	240.87
Candidatus Merdivicinus	168.81	224.49	57.815	37
Alloprevotella	66.68	58.84	223.995	133.635
Candidatus Egerieicola	166.35	211.09	45.595	52.205
unclassified Pseudomonadota genus	95.94	93.71	137.585	147.505
Copranaerobaculum	74.08	246.5	121.95	26.615
unclassified Bacteroidia genus	62.79	66.5	216.35	122.575
Longibaculum	108.31	83.8	130.19	144.46
unclassified Paenibacillaceae genus	54.82	95.33	126.725	182.565
Slackia	37.68	318.97	31.855	67.725
Olivibacter	132.98	55.59	69.175	197.485
Sphaerochaeta	52.23	192.28	102.395	106.58
Candidatus Coprocola	101.2	93.77	91.705	162.815
Acinetobacter	74.63	50.21	154.56	168.28
Anaerocolumna	111	226.21	86.055	19.22
Maribacter	78.48	32.63	152.73	172.945
Aeriscardovia	92.33	37.9	81.03	224.095
unclassified Peptococcaceae genus	171.89	112.59	88.585	50.655
Flavobacterium	288.05	28.86	52.02	52.825
Candidatus Avisuccinivibrio	55.81	23.32	120.53	219.31
Brachyspira	106.15	119.18	81.32	110.14
Marseilla	80.67	60.41	167.585	103.635
unclassified Flavobacteriales genus	178.02	73.78	127.095	33.375
Pararhodospirillum	76.25	27.39	100.385	207.505
Psychrilyobacter	139.87	83.25	61.43	126.835
Brumimicrobium	10.13	8.24	243.5	147.835
Granulicatella	144.08	88.9	130.41	42.96
Desulfosporosinus	119.33	184.26	48.165	44.655
Caproiciproducens	105.05	29.01	216.545	44.405
Candidatus Pelethomonas	67.78	266.77	38.63	21.045
Alteromonas	91.67	46.05	98.915	148.89
Anaeromonas	138.54	106.81	97.285	42.64
unclassified Mycoplasmatota genus	101.3	171.69	78.975	30.185
unclassified Flavobacteriaceae genus	91.46	38.44	84.33	167.355
Erysipelothrix	168.56	60.95	132.965	18.155
Candidatus Avoscillospira	61.08	177.27	95.095	44.76
Massilioclostridium	137.08	101.46	105.77	30.58
Agrobacterium	76.76	98.16	131.065	67.785
Pseudobutyrivibrio	75.18	177.12	85.635	31.82
Turicibacter	63.39	103.44	152.32	49.675
Floccifex	72.75	48.81	180.705	66.195
Oribacterium	66.78	208.02	65.87	20.95
unclassified Eubacteriales Family XIII. Incertae Sedis genus	232.79	60.41	55.405	10.995
Hoylesella	72.88	57.23	80.815	139.395
Enterobacter	96.76	84.93	68.505	99.645
Dysgonomonas	63.86	76.28	123.84	83.67
Aminipila	14.7	156.89	159.5	15.71
Legionella	9.24	34.59	150.08	144.75
Acetatifactor	153.93	94.6	64.285	22.56
unclassified Chloroflexota genus	109.68	45.57	46.375	132.25
Parasporobacterium	82.63	106.84	60.18	78.46
Eggerthella	38.34	91.37	118.87	79.31
Pelotomaculum	37.11	237.67	35.925	15.655
Schnuerera	85.2	80.35	53.34	106.995
unclassified Deltaproteobacteria genus	54.26	24.53	111.96	129.255
Sinanaerobacter	112.34	86.57	66.415	53.01
Halarsenatibacter	314.49	3.6	0	0
Candidatus Galacturonibacter	122.05	153.5	9.305	33.145
Evtepia	57.5	152.67	80.6	24.285
unclassified Spirochaetaceae genus	41.36	189.39	49.14	34.875
Trichococcus	117.65	59.73	101.73	29.935
Microcystis	274.87	17.77	14.76	1.255
Sebaldella	67.16	126.83	40.87	71.215
Candidatus Pullichristensenella	168.07	55.13	74.46	7.08
Syntrophomonas	112.08	25.05	47.04	111.77
Aminicella	171.38	59.39	55.565	5.615
Dielma	137.03	68.75	72.265	11.31
Maledivibacter	46.51	174.87	47.555	17.965
Flavipsychrobacter	286.4	0.22	0.14	0
Lysinibacillus	105.22	84.57	42.155	53.565
Pygmaiobacter	88.91	115.72	72.525	8.35
unclassified Erysipelotrichales genus	55.17	58.47	125.14	45.99
Photobacterium	86.1	63.22	62.165	72.87
Mycobacteroides	54.82	42.61	75.48	109.665
Petrocella	66.77	117.18	69.215	28.85
Schaedlerella	92.23	93.03	82.485	11.69
Youxingia	116.45	41.7	99.855	21
Pedobacter	81.87	53.71	104.46	37.36
Cupriavidus	66.96	27.11	103.72	78.74
Candidatus Dwaynia	158.11	37.06	58.6	20.565
Kineothrix	150.62	20.67	16.455	83.1
Dietzia	10.76	9.05	231.02	19.67
Fumia	128.78	125.52	13.68	2.375
Paludibacter	90.85	70.18	93.06	15.175
Aeromonas	83.06	49.89	68.05	67.37
Spirosoma	66.67	69.89	106.855	23.985
unclassified Mollicutes genus	64.92	31.04	112.145	58.95
Dyadobacter	30.44	79.59	75.695	80.785
Malacoplasma	43.16	34.16	152.985	34.23
Candidatus Gallacutalibacter	89.64	123.03	40.245	10.645
Duncaniella	20.48	11.54	103.015	128.26
Candidatus Stercoripulliclostridium	1.03	242.35	15.845	3.555
Anaerofustis	73.71	94.57	55.92	30.35
Parasutterella	22.47	29.21	99.705	100.43
Emergencia	72.3	83.39	85.12	9.93
Rhodoferax	34.68	140.15	25.86	48.67
Lachnobacterium	97.41	118.6	24.98	5.305
Fibrobacter	92.94	65.9	50.91	36.5
Actinobacillus	60.95	49.48	72.53	61.935
Suipraeoptans	81.13	105.24	38.38	19.92
Muribaculum	29.81	13.54	146.985	54.145
Anaerosacchariphilus	87.04	54.35	23.52	79.56
Acetobacterium	69.01	73.19	86.85	14.815
Ethanoligenens	24.43	155.07	45.16	13.14
Proteus	31.56	77.66	88.005	40.31
unclassified Porticoccaceae genus	55.35	110.85	53.02	18.24
Burkholderia	52.14	14.2	113.48	57.08
unclassified Pirellulales genus	76.58	0.03	30.275	126.28
Ligaoa	37.9	58.9	71	61.46
Lachnotalea	108.52	50.61	55.99	13.82
Corynebacterium	60.87	75.37	49.015	42.855
Candidatus Scybalocola	64.75	97.44	48.085	14.895
unclassified Acidaminococcaceae genus	17.68	180.56	19.695	6.395
Kandleria	80.5	103.52	29.275	10.185
unclassified Rikenellaceae genus	35.69	85.75	77.4	22.49
Caecibacteroides	40.37	33.12	61.645	84.18
unclassified Eggerthellaceae genus	33.01	73.52	47.605	64.425
unclassified Chitinophagaceae genus	56.75	67.69	57.305	36.67
Gottschalkia	38.62	45.36	49.165	84.16
Sedimentibacter	57.79	69.34	61.675	27.635
Hydrogeniiclostridium	107.8	61.29	34.42	11.53
Anaerosphaera	54.94	44.09	45.985	69.595
unclassified Cytophagales genus	36.78	29.65	71.975	72.945
Candidatus Faecivivens	57.92	133.9	15.615	2.445
Sarcina	45.46	41.49	44.66	77.995
Candidatus Scatomorpha	84.26	61.38	42.63	20.45
Thermoanaerobacter	127.24	13.44	19.12	48.485
Candidatus Avibacteroides	21.23	21.69	71.31	90.295
Mogibacterium	34.1	115.87	38.955	15.45
Prevotellamassilia	10.06	59.98	75.93	57.56
unclassified Cyanobacteriota genus	48.34	134.36	13.56	6.715
Robinsoniella	105.55	52.27	37.855	6.935
Alkaliphilus	39.16	87.63	25.495	47.85
Sporomusa	3.32	7.21	111.7	75.52
Extibacter	68.73	75.28	47.545	5.17
Candidatus Limivicinus	77.08	93.05	23.965	2.36
Petralouisia	29.35	92.47	64.5	9.3
Mycoplasmopsis	46.67	120.91	19.835	5.325
Lactonifactor	37.71	103.99	36.58	13.17
Dubosiella	54.23	60.15	45.75	31.16
Robertmurraya	66.09	16.89	60.305	46.68
unclassified Tannerellaceae genus	27.39	12.42	69.52	80.03
Brevibacillus	66.47	45.8	56.93	19.96
Lachnoanaerobaculum	61.11	49.82	51.025	26.22
Niameybacter	97.28	49.14	35.625	3.025
unclassified Selenomonadaceae genus	37.95	89.17	38.625	18.87
Tissierella	68.54	56.21	29.37	30.075
Facklamia	0.1	1.16	113.44	69.005
Marvinbryantia	63.07	91.71	21.57	3.07
Pusillibacter	49.62	63.67	55.065	10.49
Candidatus Onthomonas	84.4	62.91	23.735	7.73
Zongyangia	61.93	36.6	52.465	26.89
Mitsuokella	139.69	22.7	8.23	5.43
Soehngenia	79.82	34.57	56.105	5.45
Candidatus Merdiplasma	69.4	56.81	21.815	27.625
Cuneatibacter	48.93	66.06	27.725	30.8
Anaerovorax	106.65	32.63	19.89	13.45
Crocosphaera	6.01	13.15	28.88	123.775
Adlercreutzia	37.48	56.9	30.78	45.34
Gordonibacter	39.57	85.06	22.5	21.155
Desulforamulus	44.84	19.28	67.135	36.295
Nitrosomonas	37.22	54.29	45.545	28.46
Anaerococcus	77.85	61.52	14.615	11.31
Selenomonas	42.31	17.52	82.975	21.09
Candidatus Ventrousia	61.33	93.98	6.63	0.705
Geobacter	39.09	62.1	16.35	45.03
Mesosutterella	1.7	1.23	99.71	59.545
Haemophilus	20.97	41.45	65.63	33.895
Capnocytophaga	22.6	12.23	57.505	69.39
Gallicola	62.39	70.06	16.99	11.835
Mailhella	9.35	13.07	94.675	43.59
Candidatus Caccousia	39.88	73.55	29.49	15.815
unclassified Spirochaetota genus	74.98	14.36	65.655	3.7
Pantoea	14.95	18.9	61.945	61.865
Yeguia	66.07	69.68	19.415	0.7
Thioalkalivibrio	7.21	29.08	47.39	71.34
unclassified Candidatus Gastranaerophilales genus	63.55	35.24	30.87	20.065
Casaltella	23.93	45.75	36.07	43.39
Tannockella	13.92	114.77	16.165	2.59
Oxalobacter	8.34	109.8	22.25	6.835
unclassified Kiritimatiellia genus	91.41	19.98	28.32	7.495
Draconibacterium	27.82	28.76	25.26	64.885
Candidatus Limivivens	80.27	38.04	23.61	4.05
Elizabethkingia	48.16	54.57	19.815	22.805
Candidatus Faeciplasma	66.57	49.76	23.65	4.345
Gabonia	10.68	5.54	70.85	56.875
Merdimonas	59.46	33.93	33.875	15.835
unclassified Negativicutes genus	37.61	19.1	35.515	49.885
Cellulosilyticum	42.36	82.05	13.86	2.665
Tidjanibacter	27.72	15.69	60.365	36.945
Candidatus Pullilachnospira	51.86	53.33	26.67	8.075
unclassified Fusobacteriia genus	17.2	55.46	42.835	23.655
unclassified Opitutales genus	34.87	15.18	50.55	38.36
Pontibacillus	15.92	4.39	91.425	26.72
Hominisplanchenecus	52.42	37.61	26.65	20.49
Diplocloster	12.58	54.93	44.29	24.125
Vescimonas	55.85	34.99	38.15	6
Peptoanaerobacter	14.78	63.64	16.035	39.005
unclassified Candidatus Saccharibacteria genus	53.73	21.32	34.015	24.335
unclassified Betaproteobacteria genus	50.32	47.95	25.535	6.65
Lacticaseibacillus	11.38	96.96	17.87	3.83
Mordavella	32.39	40.63	34.95	21.245
Shinella	16.58	10.65	57.195	44.79
Chitinophaga	22.33	17.24	54.4	34.205
Palleniella	20.19	11.06	33.415	62.885
Candidatus Cottocaccamicrobium	28.48	71.79	21.325	5.665
Paraburkholderia	11.41	84.48	25.525	5.215
Anaerosalibacter	40.67	68.86	9.645	7.145
unclassified Anaerolineaceae genus	37.82	61.51	14.61	11.805
Finegoldia	59.88	38.67	17.67	9.455
Lactococcus	65.47	29.47	20.795	9.875
Virgibacillus	41.16	23.03	28.71	32.445
Caldicellulosiruptor	31.61	28.34	49.455	15.755
unclassified Leptotrichiaceae genus	32.33	12.82	37.02	42.755
unclassified Candidatus Omnitrophota genus	33.71	37.59	23.895	26.705
Glaesserella	18.75	5.3	39.865	57.925
Cutibacterium	41.19	35.63	26.18	17.37
Mergibacter	53.9	24.03	28.405	13.68
Neobittarella	10.51	89.33	14.49	3.875
Acetanaerobacterium	47.1	55.68	12	1.815
Sporolactobacillus	17.69	60.15	34.73	2.69
unclassified Synergistaceae genus	35.7	31.35	32.535	15.425
Granulosicoccus	16.92	12.26	35.62	49.715
Chlamydia	27.55	45.97	29.145	11.77
Sphingobacterium	37.71	39.98	18.1	17.035
Bilophila	15.29	12.67	56.36	28.47
Kurthia	33.03	40.3	20.4	17.835
Saccharofermentans	2.78	99.59	6.97	1.58
Micromonospora	43.99	11.95	18.785	33.405
Ruminobacter	18.26	28.1	34.53	27.02
unclassified Defluviitaleaceae genus	28.22	17.75	40.425	19.88
unclassified Coriobacteriaceae genus	29.85	22.99	39.57	13.63
Pseudoruminococcus	48.54	29.65	24.27	3.41
Candidatus Ventrisoma	11.85	29.18	37.745	25.46
Micrococcus	33.73	40.24	13.06	17.03
unclassified Acidimicrobiales genus	24.96	9.16	24.815	44.82
Fusibacter	16.94	46.84	13.29	26.435
Alishewanella	22.29	6.75	58.855	15.52
unclassified Aeromonadales genus	1.59	1.33	58.555	41.685
Polaribacter	43.18	33.23	12.175	14.13
unclassified Desulfobulbaceae genus	65.94	19.3	15.73	1.375
Mammaliicoccus	8.66	3.37	35.785	54.26
unclassified Armatimonadota genus	39.14	5.09	21.33	36.325
Paraglaciecola	28.41	38.79	26.745	6.6
Christensenella	49.69	40.6	8.13	1.52
Niabella	3.74	6.71	21.125	68.235
Candidatus Avimuribaculum	6.88	13.09	34.37	44.925
Alkalibaculum	39.92	34.05	11.435	13.355
Mahella	26.75	45.27	16.465	10.13
Halomonas	29.11	3.22	53.06	12.38
Sunxiuqinia	22.16	8.32	33.515	33.745
Streptobacillus	46.72	2.91	35.095	12.735
Candidatus Pelethousia	61.74	13.48	19.52	1.56
Porcipelethomonas	41.28	48.06	5.105	0.785
unclassified Burkholderiales genus	25.6	17.72	27.525	23.925
unclassified Candidatus Delongbacteria genus	14.16	17.15	29.12	33.755
Frisingicoccus	31.03	22.1	35.015	6.02
Candidatus Fimicola	30.84	37.2	19.145	5.99
unclassified Candidatus Kerfeldbacteria genus	3.8	79.11	6.62	3.55
Thiohalospira	92.65	0	0	0
Pseudorhizobium	17.81	61.12	12.3	1.315
Jilunia	8.88	26.3	35.98	21.345
Anoxybacillus	22.1	7.83	50.27	12.09
unclassified Sutterellaceae genus	8.77	5.37	48.88	28.665
Candidatus Avimonoglobus	36.33	45.32	8.605	0.595
Oceanirhabdus	34.77	41.9	7.215	5.405
Muriventricola	13.92	12.54	50.795	12.01
Halanaerobium	22.77	43.46	15.54	6.765
Cloacibacterium	17.47	52.41	15.455	2.36
unclassified Fusobacteriales genus	12.82	21.28	22.92	30.615
Clostridiisalibacter	10.95	41.28	15.36	19.54
Mycobacterium	9.06	11.13	21.45	45.09
unclassified Coprobacillaceae genus	15.46	47.96	18.555	4.59
Shewanella	10.1	6.98	31.955	37.45
Falcatimonas	84.06	1.39	0.085	0.07
Ureaplasma	12.87	45.32	22.775	4.42
Candidatus Onthocola	24.03	33.24	24.685	3.025
Hominibacterium	13.95	17.75	44.845	8.395
Tepidanaerobacter	30.74	27.45	12.175	14.14
Provencibacterium	36.15	18.99	20.89	7.445
Sphingomonas	7.2	72.07	2.385	1.435
Sneathiella	22.09	5.52	12.75	42.445
Brotonthovivens	27.99	26.08	14.2	13.75
Candidatus Choladousia	30.06	29.46	18.67	3.535
Candidatus Copromorpha	26.5	26.96	13.455	14.64
Candidatus Gallibacteroides	13.79	18.47	36.365	12.905
Millionella	10.63	13.22	35.85	21.22
Yanshouia	30.33	17.35	24.05	9.19
Crassaminicella	36.05	10.35	30.29	3.9
Proteocatella	22.11	11.95	16.765	29.76
Alkalibacterium	50.53	19.88	5.925	4.205
Wolinella	11.74	15.29	30.19	22.14
unclassified Cellulosilyticaceae genus	30.77	31.45	13.04	3.945
Providencia	23.1	12.06	26.2	17.585
unclassified Actinomycetes genus	25.97	5.44	21.34	26.05
Candidatus Pelethosoma	31.81	3.24	19.82	23.825
Colidextribacter	18.99	33.5	19.225	5.7
Globicatella	30.4	2.16	37.36	7.45
Candidatus Coprenecus	14.63	3.11	49.445	9.815
Curvibacter	29.51	22.3	23.56	1.145
unclassified Elusimicrobiota genus	25.43	27.29	13.605	10.185
Desulfobacterium	24.44	19.66	16.065	16.05
unclassified Halanaerobiales genus	5.26	47.87	14.395	8.22
unclassified Candidatus Marinimicrobia genus	10.4	38	19.205	8.07
Desulfitobacterium	13.14	12.1	24.175	26.165
Heliomicrobium	10.54	30.21	21.115	13.43
Velocimicrobium	11.2	10.23	28.125	25.5
Anaerophaga	2.14	12.76	29.32	30.585
Mycoplasma	26.63	12.23	23.725	11.67
Absicoccus	20.28	20.25	10.52	22.385
Candidatus Onthovicinus	9.94	50.35	10.795	2.14
Dialister	27.53	7.46	21.74	15.985
Caproicibacterium	13.46	35.85	19.295	3.845
Solibaculum	20.21	36.63	14.725	0.81
Monoglobus	17.07	35.31	17.58	2.135
Latilactobacillus	0.35	65.29	4.79	0.755
Alcanivorax	23.16	10.3	20.22	17.19
unclassified Succinivibrionaceae genus	23.38	7.84	17.61	22.015
Sideroxydans	3.64	17.98	24.17	24.08
Microbacterium	19.72	3.19	38.075	8.805
unclassified Thiobacillaceae genus	1.88	2.36	37.325	28.18
Aequitasia	24.63	25.75	10.38	8.24
Catonella	17.83	27.94	19.02	4.185
Candidatus Phytoplasma	37.98	15.05	12.795	2.68
unclassified Deinococcales genus	0.48	53.57	12.5	1.7
Hominimerdicola	9.21	19.33	21.11	18.14
Inconstantimicrobium	4.99	37.03	23.8	1.86
unclassified Thermoguttaceae genus	4.67	30.71	16.575	15.725
Cytobacillus	11.41	3.19	41.775	11.2
Hathewaya	5.93	46.66	10.73	4.235
Candidatus Egerieimonas	25.72	32.84	7.385	1.585
unclassified Acholeplasmataceae genus	17.09	17.84	19.955	12.565
Marasmitruncus	25.25	30.94	9.64	1.19
Candidatus Enterenecus	26.03	5.27	18.125	17.505
Candidatus Soleaferrea	25.71	28.09	10.45	2.105
unclassified Nitrospirota genus	29.98	6.16	11.885	17.77
Sporosarcina	14.07	20.28	8.005	23.41
Parablautia	13.94	35.84	14.79	1.125
Leclercia	12.27	6.14	15.695	31.35
unclassified Campylobacteraceae genus	10.61	0.36	26.91	27.54
Candidatus Azobacteroides	16.29	46.59	2.145	0.31
unclassified Oligoflexales genus	14.07	4.69	11.27	35.175
Schwartzia	19.23	24.56	12.875	8.36
unclassified Cyclobacteriaceae genus	38.99	10.01	10.37	5.4
unclassified Verrucomicrobiales genus	19.02	25.52	15.555	4.09
Aestuariivivens	53.01	1.23	2.925	6.445
unclassified Microthrixaceae genus	14.2	6.09	15.77	26.695
Pseudoalteromonas	1.78	10.08	20.345	30.54
unclassified Atopobiaceae genus	7.48	39.23	12.145	3.175
unclassified Coriobacteriia genus	13	42.61	5.12	1.035
unclassified Woeseiaceae genus	1.88	3.71	27.945	27.82
unclassified Synergistota genus	22.94	36.74	1.27	0.35
unclassified Sphaerochaetaceae genus	2.45	8.06	30.24	20.42
unclassified Comamonadaceae genus	9.79	18.78	16.375	16.075
Endobacter	20.05	2.87	31.12	6.935
Asaccharospora	29.21	8.74	7.12	15.625
Lactiplantibacillus	7.11	47.06	5.5	0.705
Qiania	15.19	35.31	5.285	4.515
Leptolyngbya	8.54	3.59	13.44	34.09
unclassified Pyrinomonadaceae genus	15.02	8.34	11.34	24.69
Candidatus Galloscillospira	34.6	9.52	13.425	1.685
unclassified Dehalococcoidales genus	12.3	18.81	14.485	13.41
Flavisolibacter	5.64	39.34	5.2	8.6
unclassified Akkermansiaceae genus	35.81	5.28	13.225	3.94
unclassified Oceanospirillaceae genus	0	0	34.53	23.105
Breznakia	15.01	21.09	16.595	4.855
Candidatus Avidehalobacter	30.18	12.84	8.49	5.115
Xylella	5.29	43.09	5.855	1.765
Crenothrix	22.71	21.76	9.64	1.55
Caminicella	17.86	4.12	25.81	7.615
Candidatus Scybalomonas	6.99	29.76	15.85	2.71
Bibersteinia	15.74	31.93	6.07	1.5
Candidatus Merdenecus	19.6	22.04	10.445	2.97
Aquabacterium	13.78	4.35	7.585	29.205
Pseudoramibacter	23.62	12.26	11.385	7.63
Candidatus Symbiothrix	6	11.75	16.895	20.195
unclassified candidate division WWE3 genus	54.77	0	0	0
Helcococcus	12.37	26.97	9.185	6.09
Faecalibaculum	26.08	6.1	9.46	12.9
Fundicoccus	20.14	18.3	5.66	10.28
Anaerovibrio	25.71	3.93	12.115	12.2
Pectobacterium	2.53	8.74	10.075	32.285
Pricia	0.41	0.32	10.555	42.105
Candidatus Aphodousia	2.2	3.17	26.75	20.49
Candidatus Scybalosoma	26.43	7.52	6.47	12.155
Saccharicrinis	16.25	13.62	10.345	11.83
Limosilactobacillus	17.19	14.11	13.62	6.89
Candidatus Limisoma	4.5	0.63	30.23	15.75
Anaeroplasma	2.77	45.7	1.27	1.185
Anaeromicropila	3.57	38.76	5.46	2.81
Beduini	16.27	28.25	5.315	0.765
Konateibacter	13.2	20.46	6.755	9.955
Candidatus Nitrosoglobus	17.03	8.58	14.73	9.675
Fictibacillus	8.51	18.51	8.75	14.23
Deferrisoma	1.37	2.34	24.5	21.24
Candidatus Scatomonas	23.99	4.57	13.56	6.52
unclassified Symbiobacteriaceae genus	2.2	6.92	21.905	17.105
unclassified Victivallales genus	5.24	31.7	7.955	3.09
Cronobacter	5.35	4.21	12.175	26.13
Neobacillus	9.08	29.35	2.47	6.835
Aliarcobacter	3.28	6.96	15.605	21.8
Citrobacter	14.42	14.83	8.24	10.135
Actinotignum	12.93	15.58	10.14	8.78
Arcticibacter	1.31	5.37	22.555	18.135
Oceanisphaera	21.06	5.29	13.135	7.815
unclassified Veillonellaceae genus	17.75	14.56	12.94	1.94
Massilibacteroides	9.85	4.17	20.23	12.75
Mucinivorans	1.84	9.13	17.25	18.3
Gelidibacter	9.06	4.1	15.43	17.65
Olsenella	17.83	7.32	6.7	14.11
Vagococcus	9.58	28.34	6.09	1.86
Zhenhengia	7.04	26.17	5.985	6.05
Senegalia	20.54	5.78	16.8	1.82
Pseudostreptobacillus	20.59	21.6	1.065	1.455
Bradyrhizobium	1.27	1.81	21.835	19.31
Enorma	32.56	9.35	1.86	0.45
Zhenpiania	23.29	6.07	12.15	2.54
Candidatus Borkfalkia	12.07	19.24	11.265	1.115
Acetobacter	6.57	26.81	5.24	4.67
Pleomorphomonas	14.17	2.06	9.55	17.405
unclassified Acholeplasmatales genus	15.93	12.08	9.295	5.835
Raoultibacter	4.03	31.93	4.355	2.32
unclassified Pasteurellaceae genus	12.12	1.46	24.67	4.38
Candidatus Faecisoma	16.34	5.08	14.8	6.39
Photorhabdus	9.59	3.22	22.465	6.885
Ureibacillus	13.63	13.4	11.97	3.02
Oceanivirga	3.2	21.63	13.07	4.12
Defluviitalea	6.77	10.05	19.415	5.77
Roseicitreum	1.03	8.43	16.045	16.465
Sangeribacter	0.95	8.8	12.655	19.5
Candidatus Pelethocola	9.53	17.15	10.445	4.725
Dehalobacterium	8	6.71	8.465	18.505
Candidatus Fimihabitans	22.5	6.77	5.465	6.755
Vermiculatibacterium	17.34	14.77	7.895	1.27
Pyramidobacter	16.94	8.4	13.2	2.695
Gemella	5.59	21.81	3.465	9.915
Rubeoparvulum	6.02	12.85	18.98	2.925
unclassified Planctomycetales genus	3.55	7.47	12.97	16.78
Rossellomorea	1.49	34.35	3.635	1.275
Anaerobium	17.86	12.85	5.265	4.715
unclassified Syntrophomonadaceae genus	10.13	11.96	15.43	3.02
Candidatus Stercorousia	5.67	3.74	17.44	13.39
Thermotoga	9.47	3.02	14.265	13.235
Herbinix	5.04	8.54	16.445	9.95
Gluconobacter	0	0.69	33.125	6.025
Deferribacter	15.85	18.63	1.8	3.355
Marinifilum	10.63	2.93	19.395	6.515
Candidatus Merdicola	1.22	22.21	6.585	9.215
Suilimivivens	5.81	8.15	19.82	5.44
unclassified Acidimicrobiia genus	17.3	4.36	14.015	3.44
Stutzerimonas	10.7	19.93	6.98	1.455
Papillibacter	35.33	0.98	2.065	0.255
Murdochiella	0.04	37.41	0.62	0.525
Volucribacter	19.36	18.67	0.295	0.095
unclassified Chthonomonadales genus	2.25	17.46	16.22	2.44
Caproicibacter	18.8	16.42	2.545	0.6
Persicitalea	9.43	21.6	6.705	0.38
Novisyntrophococcus	19.41	16.85	1.45	0.315
Fastidiosipila	2.88	1.74	19.655	13.6
Aerococcus	10.89	12.11	13.645	1.185
Mobilibacterium	5.01	2.25	16.11	14.185
Caloramator	17.3	15.01	2.25	2.885
Massilistercora	15.62	16.77	1.74	3.175
unclassified Kordiimonadaceae genus	0.23	32.9	3.685	0.43
Alitiscatomonas	4	10.68	18.79	3.475
Otoolea	2.21	27.07	6.665	1
Citricoccus	34.43	0.41	1.35	0.435
unclassified Neisseriaceae genus	6.06	4.76	12.715	12.69
Candidatus Scatavimonas	19.99	9.75	5.45	1.02
Alloalcanivorax	4.22	25.98	3.715	2.215
Atopobium	2.86	23.55	6.775	2.83
Candidatus Methylacidithermus	0.16	19.69	15.405	0.42
Novimethylophilus	11.3	1.53	21.275	1.57
Rikenella	4.64	2.78	19.015	9.07
Hypnocyclicus	6.91	6.36	6.175	15.85
Candidatus Alectryocaccomicrobium	7.82	22.75	4.225	0.34
Subsaxibacter	10.48	1.38	18.545	4.665
Nocardioides	2.67	8.93	12.635	10.69
Qingrenia	11.52	20.54	2.665	0.19
Proteiniclasticum	32.22	1.86	0.28	0.495
Beggiatoa	8.09	13.29	10.95	2.44
unclassified Rhodospirillales genus	8.75	9.1	8.08	8.77
unclassified Syntrophaceae genus	10.92	11.55	6.01	6
Alkalitalea	8.58	3.18	7.605	15.1
Desulfonema	1.35	28.97	2.3	1.63
Ferrimonas	0.98	11.86	18.945	2.44
Sanguibacteroides	13.94	17.69	2.135	0.335
unclassified Verrucomicrobiae genus	6.7	4.12	10.905	12.3
Janthinobacterium	1.54	6.15	13.2	13.075
Thorsellia	9.77	1.36	18.815	3.985
Caldibacillus	28.97	1.25	1.93	1.73
Anaeromicrobium	9.92	19.66	2.92	1.275
Shuttleworthia	0.99	29.94	2.65	0.155
unclassified Dysgonomonadaceae genus	2	2.37	22.69	6.53
Gehongia	10.02	7.83	14.425	1.26
Paenarthrobacter	10.99	1.37	3.965	16.935
Proteiniphilum	6.22	7.06	7.37	12.58
Ensifer	0	0.26	14.185	18.57
Schaalia	4.22	1.45	12.095	14.92
Butyribacter	14	14.55	1.275	2.825
unclassified Bdellovibrionales genus	2.32	25.09	4.28	0.92
Eggerthia	7.48	9.83	13.345	1.875
Paramaledivibacter	31.98	0.52	0	0.03
Thermobrachium	18.09	13.72	0.355	0.21
unclassified Elusimicrobiaceae genus	7.49	7.54	14.44	2.785
Pseudoclostridium	12.98	4.64	4.925	9.645
Riemerella	9.17	19.26	1.345	2.25
Hallerella	10.55	11.86	4.015	5.19
Cohnella	7.22	9.5	12.35	2.465
Liquorilactobacillus	31.49	0	0.01	0
Candidatus Caccomonas	0	3.78	23.935	3.53
Taylorella	1.02	1.59	14.985	13.475
Brochothrix	5.17	2.34	10.59	12.89
Kocuria	8.23	9.89	6.735	5.79
Candidatus Faecivicinus	4.57	14.25	7.97	3.745
unclassified Sphingobacteriales genus	5.26	18.23	4.83	2.135
Ilumatobacter	8.52	8.87	6.99	6.04
Variimorphobacter	4.32	25.59	0.395	0.03
Nocardia	5.8	9.09	7.82	7.62
Labilibaculum	6.21	8.96	5.61	9.39
Seramator	26.76	3.39	0	0
Sinomicrobium	11.85	1.59	4.98	11.645
Lepagella	3.91	3.93	10.335	11.66
Arcobacter	7.96	7.81	5.785	8.07
Johnsonella	8.04	7.61	6.165	7.77
Anaerosporomusa	5.05	17.89	2.93	3.625
Jeotgalibaca	10.52	9.4	8.94	0.585
Puteibacter	0.39	1.33	13.675	13.915
Desulfococcus	0.83	1.19	14.495	12.62
unclassified Aerococcaceae genus	6.44	18.82	2.295	1.245
unclassified Carnobacteriaceae genus	0.53	24.18	3.15	0.78
Companilactobacillus	11.83	7.56	6.95	2.155
Sporobacter	8.66	9.35	7.04	3.36
unclassified Dehalococcoidia genus	2.15	2.59	10.975	12.445
Dethiosulfatibacter	7.04	13.46	4.925	2.72
unclassified Bacillaceae genus	0.53	19.11	6.735	1.77
Gallibacter	0.03	0.18	19.755	8.1
Candidatus Fimiplasma	11.73	5.34	9.52	1.415
Macrococcus	10.09	10.44	3.415	4.05
Ileibacterium	10.62	9.35	4.015	4.01
Candidatus Limiplasma	4.14	5.3	10.43	8.045
Marmoricola	0.53	25.69	1.29	0.315
Succinimonas	19.17	2.66	2.375	3.44
Gracilibacillus	3.63	17.41	2.72	3.845
unclassified Prolixibacteraceae genus	8.27	1.56	13.77	3.995
Rhodopirellula	3.86	0.02	12.975	10.67
Desnuesiella	12.51	10.23	3.445	1.215
Geoalkalibacter	4.68	3.47	7.455	11.49
Metabacillus	8.58	5.49	7.125	5.815
Candidatus Ornithoclostridium	14.79	8.24	3.285	0.3
Arenibacter	10.03	1.19	13.025	2.355
Candidatus Scatovicinus	9.42	7.99	4.06	5.12
Mesorhizobium	4.66	13.16	6.95	1.72
Candidatus Aphodomonas	14.16	8.69	3.165	0.46
Candidatus Faecaligallichristensenella	14.74	11.14	0.46	0.075
Syntrophobotulus	7.88	17.49	0.85	0.195
Pasteurella	6.47	6.89	7.78	5.055
Nitrospira	5.86	1.3	15.39	3.62
Arthrobacter	1.96	21.78	2.13	0.29
unclassified Bifidobacteriaceae genus	7.91	17.82	0.01	0.34
unclassified Actinomycetales genus	4.02	15.2	6.555	0.295
Thermoanaerobacterium	2.55	5.15	15.05	3.24
Solimicrobium	0.86	2.1	12.36	10.635
Fluviicola	3.58	1.72	11.515	9.05
Frankia	5.54	3.12	5.835	11.08
unclassified Saprospiraceae genus	15.53	5.62	3.32	0.995
Congzhengia	16.23	0.19	2.53	6.47
Nostoc	4.96	18.81	1.25	0.28
Mesobacillus	0.77	4.47	8.915	11.085
Marinovum	2.44	0	12.21	10.555
Fructilactobacillus	16.07	5.15	1.99	1.985
Anaerorhabdus	6.28	12.15	5.73	0.915
Carboxydothermus	7.26	10.52	4.02	3.255
unclassified Marinilabiliales genus	5.76	0.63	15.495	2.995
Xiamenia	13.14	2.36	8.275	1.03
Methyloversatilis	7.08	2.01	3.275	12.3
Novacetimonas	0.59	11.54	11.98	0.37
Achromobacter	2.07	6.04	8.96	7.345
Dictyoglomus	0	24.35	0	0
Macellibacteroides	3.94	2.83	9.445	8.12
unclassified Campylobacterales genus	12.82	5.37	2.535	3.585
Gilliamella	0.56	0.7	9.98	12.965
Simplicispira	8.42	8.18	7.015	0.535
Sporofaciens	9.72	8.71	2.72	2.905
Ndongobacter	23.18	0.82	0.05	0
Candidatus Ventricola	3.28	11.62	8.81	0.33
Ralstonia	1.02	1.51	12.79	8.63
Chordicoccus	19.04	4.7	0.175	0.025
Gallintestinimicrobium	0.33	21.59	1.305	0.365
Symbiobacterium	0	20.63	2.525	0.415
Methylosinus	20.99	0.36	1.865	0.13
Otariodibacter	1.79	1.07	2.735	17.715
Zoogloea	8.64	3.96	3.38	7.31
Isachenkonia	6.8	6.86	4.14	5.44
unclassified Halobacteriovoraceae genus	0	0	23.21	0.025
Murimonas	10.9	4.84	5.48	1.985
unclassified Lactobacillales genus	12.76	5.37	1.26	3.565
Candidatus Avilachnospira	2.11	16.06	4.17	0.495
Leuconostoc	2.51	1.58	14.57	4.05
Lutispora	1.64	19.62	1.24	0.17
Fenollaria	2.44	3.27	10.05	6.86
Gallibacterium	0.47	18.41	1.895	1.655
Candidatus Nitrotoga	4.73	6.82	6.385	4.395
unclassified Melioribacteraceae genus	12.55	1.5	5.925	2.175
unclassified Candidatus Melainabacteria genus	13.99	2.15	5.61	0.28
Niallia	2.32	9.39	5.02	5.23
Candidatus Faecimorpha	6.66	13.91	1.265	0.085
Laedolimicola	3.55	12.28	3.865	2.155
unclassified Nitrosomonadaceae genus	0.87	0.57	11.075	9.27
Echinicola	0.35	20.07	0.985	0.285
unclassified Selenomonadales genus	9.83	5.26	4.99	1.285
Sedimenticola	11.15	9.86	0.295	0
Knoellia	0.47	14.44	3.15	2.68
Thioalbus	1.08	15.19	3.46	0.775
Cloacibacillus	12.49	2.1	4.08	1.83
unclassified Gemmataceae genus	0.84	0.99	10.285	8.375
unclassified Chthoniobacterales genus	5.77	13.33	0.905	0.335
unclassified Bacillales genus	6.85	3.83	6.98	2.68
Peribacillus	10.86	2.89	4.685	1.84
unclassified Hyphomicrobiales genus	0.12	0.05	6	14.1
Telluribacter	11.65	1.3	6.75	0.565
Quadrisphaera	4.77	0.85	11.91	2.595
Algoriella	6.41	4.19	4.435	4.93
Candidatus Avacidaminococcus	4.38	1.92	4.365	8.925
Marinomonas	0.12	0.62	11.32	7.505
Luteimonas	5.3	1.98	4.15	7.945
Mobilisporobacter	6.1	9.2	2.945	1.06
Desulfolucanica	16.83	1.23	0.585	0.655
Mesoplasma	10.16	6.23	2.135	0.685
Candidatus Avanaerovorax	3.58	2.57	4.725	8.29
Candidatus Merdisoma	4.98	3.01	5.505	5.55
Erwinia	3.35	7.22	4.195	4.155
Brevibacterium	18.73	0.08	0.01	0.005
Azospirillum	7.41	2.57	5.015	3.68
Neisseria	0.9	1.02	9.38	7.335
unclassified Alteromonadaceae genus	0.28	0.17	3.37	14.55
Gallalistipes	1.02	0.11	7.24	9.845
Candidatus Fimivivens	0.73	7.45	8.585	1.42
Flexilinea	10.4	1.65	5.545	0.425
Bulleidia	12.57	0.67	3.59	1.09
Thermocaproicibacter	0.75	14.64	2.165	0.355
Methylocaldum	2.56	6.46	7.075	1.78
Senegalimassilia	0.73	15.69	1.28	0.14
unclassified Rhodospirillaceae genus	7.38	0.93	3.42	6.105
Cysteiniphilum	1.66	2.97	5.815	7.37
unclassified Candidatus Izimaplasma genus	0.06	13.05	1.45	3.245
Idiomarina	5	0.63	10.035	2.08
Candidatus Ornithocaccomicrobium	5.81	11.02	0.795	0.08
Candidatus Fimivicinus	10.75	6.36	0.45	0.135
unclassified Actinomycetota genus	5.53	4.52	5.275	2.26
Yoonia	1.68	13.41	2.04	0.445
Propionibacterium	4.39	1.06	11.215	0.855
Candidatus Caccoplasma	4.26	1.35	6.685	5.205
Brotolimicola	7.98	9.3	0.185	0.02
Harryflintia	2.61	9.04	3.69	2.095
Candidatus Caccomorpha	12.44	2.97	1.58	0.33
Catenibacillus	0.99	10.77	4.685	0.865
Microbulbifer	0.08	15.82	1.105	0.265
Exiguobacterium	1.93	12.09	2.14	0.91
Candidatus Fimenecus	6.14	8.68	1.14	0.73
Novosphingobium	1.17	13.15	1.64	0.695
Marivirga	4.39	0.52	9.67	1.92
Caldanaerobius	0.81	13.87	1.51	0.265
Colibacter	2.77	12.09	0.565	1.005
Myroides	1.96	2.66	5.765	5.86
Luoshenia	7.38	8.19	0.605	0.005
Huintestinicola	1.4	8.81	4.045	1.885
Sneathia	5.59	2.9	2.33	5.285
Siccationidurans	7.12	8.28	0.47	0.205
Gorillibacterium	4.77	5.04	1.585	4.605
unclassified Desulfobacterales genus	1.91	2.54	6.26	5.29
Jeotgalibacillus	5.76	4.74	5.01	0.29
Serratia	5.18	1.29	5.17	4.13
Thermodesulfobacterium	3.66	0.92	9.365	1.825
Luteimicrobium	0.1	13.98	1.195	0.48
Pectinatus	1.73	8.15	3.8	2.065
Pisciglobus	8.82	1.18	5.135	0.475
Candidatus Caccovicinus	4.29	6.52	3.27	1.52
Candidatus Ventrimonas	0.94	14.02	0.445	0.09
Carboxylicivirga	3.48	1.7	4.395	5.86
Simiaoa	1.25	1.86	9.535	2.775
Aneurinibacillus	0.81	1.02	5.56	8.02
Candidatus Pelagibacter	3.46	0.76	2.57	8.54
Pontibacter	5.07	0.77	7.005	2.42
Irregularibacter	4.25	9.85	0.82	0.245
Alicyclobacillus	1.66	11.54	1.335	0.45
Weissella	6.65	5.2	2.055	1.075
Winogradskyella	7.78	0.92	4.27	1.885
Rubrobacter	0	0.06	13.525	1.18
Paraeggerthella	3.97	8.2	1.685	0.79
Candidatus Accumulibacter	0.59	4.14	7.425	2.475
Canicola	11.57	0.74	0.875	1.435
Geosporobacter	7.4	1.82	2.345	3.01
Algoriphagus	9.6	1.53	2.75	0.695
unclassified Candidatus Cloacimonadota genus	0.91	1.12	9.555	2.98
Pseudozobellia	2.81	6.99	3.485	1.26
Rubrivirga	12.53	1.79	0.095	0.03
Acidiphilium	12.92	1.49	0.015	0
Testudinibacter	4.34	4.89	2.575	2.55
Lancefieldella	0.92	12.56	0.615	0.22
Halobacteroides	0.19	13.51	0.435	0.175
Pelosinus	6.49	5.94	1.005	0.73
Scytonema	2.48	0.38	7.02	4.08
Psychrobacillus	2.66	9.38	1.235	0.65
unclassified Blastocatellia genus	12.51	1.14	0.12	0.025
unclassified Tepidanaerobacteraceae genus	3.16	1.56	4.475	4.575
Candidatus Onthousia	4.95	0.63	2.71	5.38
Bilifractor	3.01	1.37	7.58	1.7
Planococcus	1.52	0.99	4.025	7.095
Kosakonia	13.47	0.02	0	0.045
Suonthocola	2.1	6.36	4.61	0.425
Rickettsia	12	1.06	0.23	0.035
Mobiluncus	0.34	0.63	10.67	1.665
Candidatus Aphodoplasma	3.37	6.75	0.835	2.315
unclassified Campylobacterota genus	1.49	1.97	4.66	5.14
Petrimonas	2.21	1.94	3.35	5.755
Moraxella	8.92	3.96	0.075	0.27
Priestia	5.57	2.97	2.665	1.79
Lysobacter	4.58	1.66	3.085	3.585
unclassified Candidatus Riflebacteria genus	4.58	0.97	6.15	1.195
unclassified Weeksellaceae genus	6.85	0.7	3.03	2.27
unclassified Pasteurellales genus	11.58	0.95	0.125	0.085
Candidatus Marithrix	0.49	4.44	3.855	3.94
Massilia	1.13	2.16	5.28	3.965
Candidatus Coprovicinus	11.62	0.37	0.435	0.09
Abiotrophia	2.48	8.66	0.51	0.84
Humibacillus	1.83	8.58	1.03	1.035
Natroniella	1.04	9.61	1.48	0.325
Hornefia	11.14	0.5	0.625	0.085
unclassified Atribacterota genus	4.86	0.24	4.875	2.375
unclassified Salinivirgaceae genus	2.07	2.51	5.655	2.09
Dolosigranulum	6.37	0.91	0.97	4
Candidatus Limihabitans	0.46	0	10.57	1.195
Mageeibacillus	3.27	6.57	0.98	1.38
unclassified Thermosediminibacteraceae genus	5.04	5.4	1.035	0.605
Geminocystis	0.1	0.1	2.195	9.555
Carboxydocella	3.88	4.59	2.51	0.935
Acholeplasma	6.95	0.34	1.255	3.355
Ginsengibacter	7.13	1.33	3.145	0.285
Jutongia	8.16	2.14	0.82	0.735
Candidatus Coprosoma	1.43	0.06	9.865	0.415
Stomatobaculum	3.32	2.71	2.325	3.345
Aquimarina	3.1	0.81	3.415	4.355
Candidatus Fimousia	4.73	2.28	4.145	0.375
Dehalobacter	8.36	2.63	0.5	0.03
Ezakiella	0.25	6.56	3.41	1.265
Albibacterium	1.93	1.17	3.47	4.91
Galactobacillus	7.28	1.39	2.475	0.3
Derxia	1.36	0	5.225	4.825
Desulfogranum	2.54	0.52	6.76	1.585
Levilactobacillus	1.5	1.71	5.29	2.865
Pseudogulbenkiania	1.96	1.06	3.42	4.905
unclassified Treponemataceae genus	5.87	4.35	0.91	0.17
Thermoclostridium	4.82	5.46	0.99	0.005
Scatolibacter	0.32	0.64	5.54	4.74
Thermosipho	4.75	0.17	5.635	0.64
Microvirga	2.44	8.42	0.32	0.005
Varibaculum	3.73	2.34	3.715	1.35
unclassified Candidatus Roizmanbacteria genus	9.69	0.64	0.06	0.72
Ancylomarina	11.02	0	0.005	0
Ferruginibacter	2.15	7.99	0.76	0.085
unclassified Rhodothermaceae genus	8.74	1.06	0.5	0.605
Pelorhabdus	3.09	0.43	2.77	4.53
Oceanobacillus	4.34	1.84	2.91	1.695
Nonomuraea	0.04	10.7	0.025	0
Terribacillus	3.74	3.89	1.33	1.785
unclassified Mycoplasmataceae genus	2.48	0.48	5.67	2.08
Clavibacter	0.75	7.92	1.81	0.22
Oxobacter	3.28	5.16	1.985	0.245
Sediminivirga	6.51	2.29	1.785	0.07
Candidatus Choladocola	9.93	0.13	0.505	0.045
Rhizobacter	5.36	1.6	3.29	0.335
Ramlibacter	1.03	6.1	1.665	1.625
Acidaminobacter	2.16	6.57	1.205	0.185
Evansella	9.7	0.06	0.29	0.03
Candidatus Scatovivens	1.06	0	3.36	5.63
unclassified Enterobacteriaceae genus	0.25	1.11	4.54	4.14
unclassified Peptoniphilaceae genus	7.8	0.92	0.805	0.48
Francisella	2.02	0.52	2.065	5.395
Acetoanaerobium	4.71	0.25	3.2	1.815
unclassified Dermatophilaceae genus	0.23	9.68	0.065	0
unclassified Rhodocyclaceae genus	1.76	5.26	2.475	0.475
Dendrosporobacter	8.22	0.8	0.515	0.335
Anaerobacterium	6.32	3.03	0.42	0.025
Sulfurimonas	0.05	0.56	2.185	6.955
Pseudoprevotella	1.8	3.96	3.46	0.5
Intrasporangium	0.17	8.96	0.465	0.1
Lentilactobacillus	3.64	3.11	2.75	0.19
unclassified Candidatus Dadabacteria genus	0.78	1.06	6.31	1.455
Giesbergeria	7.4	2.16	0.03	0.005
Sporocytophaga	0.59	0.66	4.255	4.085
unclassified Gemmatimonadota genus	0.63	0.9	5.065	2.995
Alkalihalophilus	3.6	3.36	1.465	1.16
Ornithobacterium	0.32	1.65	3.46	4.115
unclassified Lentimicrobiaceae genus	2.64	0.71	5.04	1.155
unclassified Herpetosiphonaceae genus	9.2	0.03	0.235	0.05
Psychromonas	1.12	2.03	3.925	2.435
Ornithinibacillus	1.02	1.38	3.015	4.045
Candidatus Onthomorpha	3.58	0.89	4.79	0.2
Edwardsiella	0.7	0.04	4.735	3.96
Variovorax	1.76	6.95	0.6	0.12
Geobacillus	1.66	4.13	1.33	2.285
Wansuia	4.72	2.06	2.185	0.435
Stenotrophomonas	0.75	2.88	2.485	3.235
Mediannikoviicoccus	1.41	6.49	0.395	1.035
Candidatus Ornithomonoglobus	4.81	2.08	1.77	0.56
Lapidilactobacillus	2.62	6.54	0.02	0
Corallococcus	4.98	4.1	0.04	0.035
Desulfosarcina	7.23	0.92	0.805	0.175
Phycicoccus	0.88	7.03	1.085	0.13
Lagierella	4.69	1.75	2.35	0.28
Brotomerdimonas	0.31	6.77	1.46	0.38
Achromatium	0	0	3.05	5.855
unclassified Chlorobiota genus	0.45	6.9	1.29	0.25
unclassified Solirubrobacterales genus	2.38	2.77	1.555	2.165
Prolixibacter	0.96	2.88	1.89	3.095
Limnohabitans	1.76	6.16	0.42	0.455
Senimuribacter	1.47	0.37	6.36	0.585
unclassified Arcobacteraceae genus	1.97	1.68	3.47	1.65
Synergistes	6.8	1.02	0.785	0.14
Acidithiobacillus	0	0	6.885	1.8
Atopostipes	1.32	6.73	0.54	0.035
Mesomycoplasma	0.42	4.53	3.245	0.41
Dickeya	0.22	6.74	1.33	0.29
Lautropia	8.21	0	0.35	0.015
Mucilaginibacter	3.93	1.44	1.845	1.335
Stigmatella	0.88	0.05	4.42	3.185
unclassified Tissierellaceae genus	4.62	3.72	0.185	0.01
Yersinia	8.16	0.01	0.175	0.185
Neofamilia	2.05	4.57	1.67	0.21
Candidatus Onthenecus	5.2	0.31	2.49	0.46
Alkalibacter	2.61	5.02	0.285	0.48
Candidatus Aphodovivens	0	8.31	0.045	0.005
Desulfohalovibrio	0.65	0.46	3.875	3.365
unclassified Coriobacteriales genus	4.62	1.54	1.265	0.91
Caballeronia	2.62	2.83	1.33	1.535
Fibrella	1.56	6.11	0.45	0.12
Feifania	2.83	4.24	1.115	0.05
Candidatus Avichristensenella	0.84	6.31	0.965	0.105
Desulfomicrobium	0.08	0.37	6.45	1.3
unclassified Fimbriimonadales genus	1.04	3.09	1.365	2.585
unclassified Chitinophagia genus	2.24	0.52	3.955	1.36
Candidatus Coprousia	0.44	6.18	1.125	0.185
Solidesulfovibrio	0.12	0.45	4.5	2.785
unclassified Alcaligenaceae genus	1.13	0.09	1.335	5.27
Dehalococcoides	3.14	0.08	4.255	0.335
unclassified Lentisphaerota genus	0.67	2.25	4.145	0.735
unclassified Kribbellaceae genus	1.2	4.71	1.755	0.1
Snodgrassella	2.94	1.16	1.505	2.115
unclassified Caldilineaceae genus	1.66	0.11	3.14	2.77
Sulfurovum	0.59	1.31	1.45	4.25
Paramuribaculum	0.23	0.05	1.595	5.715
Hyphomicrobium	0.18	0.78	2.675	3.905
unclassified Candidatus Hydrothermae genus	4.35	0.8	2.05	0.34
Anaerolactibacter	2.99	0	3.985	0.5
Caloranaerobacter	2.63	4.11	0.565	0.115
Gudongella	2.88	3.23	0.375	0.93
Hugonella	0.36	6.12	0.815	0.11
unclassified Opitutae genus	0.38	1.15	1.525	4.305
Salinibacter	7.3	0	0	0.005
Calothrix	0.51	0	4.41	2.38
Paenisporosarcina	3.18	0.58	1.57	1.94
unclassified Flavobacteriia genus	1.52	0.09	3.14	2.42
Sulfurihydrogenibium	0.74	0.68	5.38	0.36
Desmonostoc	0.68	2.62	3.515	0.315
unclassified Mycoplasmatales genus	0.01	0	5.485	1.61
Bacilliculturomica	1.43	2.51	2.045	1.105
Hanamia	4.6	0.57	1.66	0.225
unclassified Oligosphaeraceae genus	0.18	1.26	2.6	2.93
Halalkalibacter	0.13	6.65	0.045	0.14
Abyssisolibacter	0.99	2.21	3.09	0.67
Saccharibacillus	2.9	3.15	0.73	0.085
Seonamhaeicola	3.31	0.48	0.41	2.635
Paraliobacillus	0.27	2.22	2.42	1.85
Dellaglioa	2.52	3.57	0.255	0.395
Rhodomicrobium	1.85	0.18	3.845	0.84
Rubrivivax	0.38	0.69	3.47	2.175
Oleispira	6.61	0	0.025	0.015
Poseidonibacter	1.08	0.92	1.175	3.45
Inediibacterium	1.28	3.56	0.71	1.065
Frigoriflavimonas	6.16	0.04	0.34	0.03
Ottowia	1.01	2.53	1.53	1.39
unclassified Tissierellales genus	2.59	1.25	1.47	1.07
Acidovorax	3.22	2.5	0.505	0.145
Labilithrix	5.46	0.86	0	0.04
Thalassobacillus	0.01	0.01	1.92	4.41
Acetitomaculum	4.83	0.03	0.995	0.425
Jingyaoa	0	2.31	2.165	1.77
unclassified Ignavibacteriales genus	0.08	1	2.845	2.29
Segetibacter	1.55	3.35	0.46	0.82
Peptococcus	5.47	0.61	0	0
Coprothermobacter	0.31	0.69	2.78	2.275
Methylophaga	3.6	0.5	1.15	0.76
unclassified Candidatus Eremiobacterota genus	2.83	2.06	0.765	0.355
Natronincola	0.2	1.77	2.675	1.305
Hyunsoonleella	1.59	0.31	0.48	3.53
Pimelobacter	0.42	4.35	1.045	0.095
Desulfonispora	1.25	1.83	1.625	1.19
Kallipyga	4.66	1.02	0.195	0.015
Paracnuella	2.67	0.55	0.935	1.735
Budvicia	0.16	0.59	2.75	2.37
Weizmannia	0.46	1.23	1.34	2.84
Diaphorobacter	3.54	0.38	1.825	0.11
Aliibacillus	2.1	3.68	0.065	0
Sediminibacillus	5.83	0	0	0
Floricoccus	3.66	0.3	0.615	1.235
unclassified Sphingobacteriia genus	0.32	0	3.51	1.935
Paucibacter	0.78	1.8	2.925	0.25
Oliverpabstia	0.89	1.32	3.04	0.46
Ketobacter	0.96	4.02	0.55	0.15
Allisonella	5.46	0.04	0.155	0.015
Candidatus Aveggerthella	0	5.62	0	0
Portibacter	0.02	2.86	0.385	2.33
Solitalea	5.52	0.07	0	0
Anaerotalea	0.24	1.05	1.82	2.46
Gardnerella	1.41	1.47	2.44	0.21
unclassified Anaerolineales genus	0	3.83	1.395	0.295
Candidatus Scatousia	0.09	0.6	3.015	1.805
Candidatus Egerieisoma	0.91	3.04	1.425	0.13
Thermophilibacter	2.23	2.1	0.99	0.145
Paratissierella	0.15	2.9	1.115	1.225
Lutibacter	0.17	0.22	3.26	1.67
Candidatus Cryptobacteroides	0.41	0.04	3.46	1.4
unclassified Thiotrichales genus	0.88	0.01	2.385	2.005
Candidatus Spyradocola	0.57	2.43	2.095	0.16
Cryptobacterium	0	4.95	0.12	0.18
Histophilus	4.82	0.06	0.035	0.295
Vaginella	0.34	0.09	4.165	0.575
Gordonia	0.37	0.38	2.54	1.865
Empedobacter	2.9	1.69	0.135	0.43
Mobilitalea	1.11	2.78	1.235	0.005
unclassified Candidatus Woesebacteria genus	0.07	0	1.785	3.235
Tenacibaculum	1.94	1.16	1.105	0.835
Adhaeribacter	2.58	1.07	0.425	0.95
Pragia	0.13	0.24	2.7	1.945
Neolewinella	1.93	2.73	0.34	0
Candidatus Alectryocaccobium	1.98	2.71	0.25	0.055
unclassified Fibrobacterota genus	0	0.02	0.9	4.02
Anaeropeptidivorans	0.3	2.19	0.575	1.86
Pseudonocardia	4.66	0.12	0.115	0.015
Desulfobulbus	0.01	0.14	3.685	1.035
unclassified Pseudobdellovibrionaceae genus	0.01	1.08	0.525	3.24
unclassified Ignavibacteriota genus	2.54	0.4	1.35	0.555
Salinimicrobium	1.72	0.15	2.13	0.84
Verminephrobacter	1.21	3.6	0	0
Oleidesulfovibrio	0.02	0.14	3.92	0.705
Cellulophaga	1.43	0.04	1.785	1.495
unclassified Paracoccaceae genus	0.45	0.11	2.97	1.215
Alkalihalobacillus	1.89	0.98	0.825	1.005
Salegentibacter	4.54	0.08	0.07	0.005
Fretibacterium	4.56	0.1	0	0
Candidatus Cloacimonas	0.74	1.96	0.505	1.45
Caldicoprobacter	0.1	0.09	0.795	3.64
Comamonas	1.37	0.19	2.155	0.89
Filifactor	2.13	2.09	0.22	0.155
Halodesulfovibrio	0.32	0.4	3.175	0.685
Pusillimonas	0.22	0.54	1.89	1.925
Paraflavisolibacter	0.01	4.53	0	0.03
Bavariicoccus	0	3.36	1.065	0.135
Vitreoscilla	4.14	0.26	0.135	0
unclassified Thermoanaerobacteraceae genus	4.25	0.11	0.12	0.015
Thiohalobacter	0.37	0.14	1.74	2.23
Hydrogenophaga	2.11	1.87	0.23	0.255
Oceanotoga	0.49	3.23	0.455	0.285
unclassified Syntrophorhabdaceae genus	3.77	0.67	0.005	0.005
Epilithonimonas	3.92	0.12	0.065	0.3
Alcaligenes	0.27	0.21	2.195	1.695
Persephonella	0.34	0	0.715	3.27
Guopingia	0.48	0.58	2.38	0.87
unclassified Verrucomicrobiota genus	1.67	1.23	0.41	0.985
Rothia	0.25	0	3.875	0.15
Candidatus Caccosoma	0.73	2.62	0.865	0.025
Halpernia	3.72	0.12	0.3	0.08
Dethiobacter	0.09	0.5	3.195	0.43
unclassified Candidatus Sumerlaeota genus	3.84	0.04	0.23	0.01
unclassified Oxalobacteraceae genus	2.76	0.97	0.36	0.01
Methylocucumis	0.1	0.05	1.025	2.915
Halolactibacillus	0.71	2.43	0.76	0.18
Phoenicibacter	0.52	0.43	1.085	2.015
Candidatus Egerieenecus	0.35	3.46	0.195	0
Zobellella	0.17	0.81	1.485	1.53
Salipiger	0	0	2.475	1.51
Candidatus Electrothrix	1.21	0.12	0.965	1.66
Caldisalinibacter	1.25	1.17	0.835	0.68
Aliivibrio	0.2	1.39	1.055	1.28
Lewinella	0.35	2.26	0.89	0.4
Lentihominibacter	2.17	1.5	0.22	0.005
unclassified Candidatus Staskawiczbacteria genus	0	3.88	0.005	0
Candidatus Ornithospirochaeta	2.54	0.65	0.49	0.19
Andreesenia	1.16	1.59	0.29	0.825
Gillisia	0.27	0.11	0.98	2.5
Candidatus Limousia	0.17	2.95	0.575	0.16
Pararheinheimera	0.78	0.09	0.9	2.085
Rhodobacter	0.01	3.5	0.27	0.065
Marinobacter	0.11	0.07	2.185	1.475
Muricauda	0.17	1.33	1.12	1.215
unclassified Ignavibacteriaceae genus	0.82	0.66	0.5	1.85
Candidatus Coproplasma	0.1	3.36	0.08	0.28
Atopobacter	0.85	0.18	0.46	2.325
Aminivibrio	2.65	0.19	0.605	0.37
unclassified Xanthomonadaceae genus	1.28	2.2	0.28	0.05
Ghiorsea	1.2	0.3	0.7	1.59
Nitratiruptor	0.04	2.75	0.84	0.15
Oxalicibacterium	0.16	0.26	1.915	1.435
Candidatus Kentron	0.21	0.16	1.365	2.02
Fannyhessea	0	3.58	0.04	0.085
Salinicoccus	1.43	0.08	2.005	0.155
Trueperella	0	0.03	3.465	0.16
Ructibacterium	0.25	2.94	0.375	0.08
Methylotenera	1.81	0.6	0.955	0.255
Stigonema	0	0	3.62	0
Borreliella	0	2.37	0.82	0.38
Morganella	0	0	1.445	2.105
unclassified Anaerolineae genus	0.53	1.73	1.145	0.14
Effusibacillus	0	0	2.525	1
Enterorhabdus	0	3.52	0	0
Haloimpatiens	0.63	1.96	0.865	0.065
Komagataeibacter	1.01	0.66	0.735	1.1
Waltera	0.41	1.53	1.24	0.31
Fontibacillus	0	3.42	0.04	0
unclassified Microscillaceae genus	0.01	0.02	0.635	2.78
Arachidicoccus	0	0.75	2.66	0.03
Candidatus Faecimonas	1.48	0.04	0.485	1.43
Pseudopedobacter	3.3	0.11	0	0
Rubneribacter	0.04	3.3	0.06	0
Arsenicibacter	0.17	2.8	0.195	0.23
Loktanella	0.03	0.15	2.865	0.33
Gabonibacter	0.87	1.1	0.895	0.48
Sinorhizobium	0.31	0.33	1.125	1.58
unclassified Candidatus Gracilibacteria genus	0.28	0.71	1.22	1.135
Commensalibacter	0.14	0.19	2.095	0.91
Cedecea	0.12	0.2	1.82	1.195
Ellagibacter	0	3.11	0.065	0.125
Pedococcus	0.23	2.05	0.84	0.13
Desulfonauticus	1.49	0.33	1.25	0.175
unclassified Candidatus Krumholzibacteriota genus	2.34	0	0.075	0.83
Thiovulum	2.71	0.15	0.16	0.215
unclassified Acidiferrobacteraceae genus	0.03	0.01	2.855	0.335
Sabulilitoribacter	3.15	0.03	0.01	0.04
Endozoicomonas	0.13	0.27	1.71	1.085
unclassified Myxococcaceae genus	3.03	0.05	0.085	0
unclassified Desulfovibrionales genus	0.04	0.07	2.62	0.41
unclassified Gallionellaceae genus	0.07	0.12	1.73	1.22
Propionispora	0.79	1.71	0.42	0.19
Rubricoccus	2.8	0.25	0.045	0.01
Candidatus Avacholeplasma	0.02	0.08	0.975	2.025
Leptospira	2.21	0.23	0.355	0.29
Rhodanobacter	0.54	0	1.385	1.155
Nakamurella	0.22	2.71	0.135	0
Sulfurospirillum	0.09	2.09	0.695	0.17
unclassified Deferribacterales genus	0.11	0.53	1.625	0.765
Sporotomaculum	0.12	2.66	0.125	0.105
Iocasia	1.2	1.29	0.45	0.065
unclassified Caldisericia genus	0.02	2.07	0.37	0.545
Caviibacter	0.05	0.89	1.01	1.05
unclassified Thermoleophilia genus	0.29	2.62	0.075	0.005
Anaerovirgula	0.26	1.29	1.055	0.315
Bullifex	0.91	1.03	0.605	0.375
Mariprofundus	0	0.69	0.88	1.34
unclassified Gracilibacteraceae genus	0.09	1.35	1.06	0.41
unclassified Fibrobacteraceae genus	0.01	0.02	2.185	0.695
unclassified Candidatus Moranbacteria genus	0.06	0.05	0.63	2.16
Tepidibacillus	0.55	1.43	0.86	0.055
unclassified Calditrichia genus	2.56	0.03	0.155	0.125
Denitrovibrio	0.01	0.07	2.235	0.53
unclassified Rickettsiales genus	1.18	0.39	0.48	0.79
Caldalkalibacillus	1.28	1.54	0.015	0
Candidatus Thiodiazotropha	0.26	0	1.555	1.015
Youngiibacter	0.01	0.46	2.29	0.07
unclassified Candidatus Nomurabacteria genus	0.01	0.07	1.69	1.04
Candidatus Ordinivivax	0.09	0	2.14	0.575
Rhodothermus	2.64	0.04	0.1	0.01
Candidatus Coprovivens	0.98	0.25	0.385	1.165
Pseudospirillum	0.04	0.09	1.25	1.38
Texcoconibacillus	0	0	0.985	1.755
Lactimicrobium	0.33	0.2	1.895	0.305
Methylophilus	2.62	0	0.025	0.07
Marinisporobacter	0.47	0.59	0.52	1.13
Laribacter	0	0	1.04	1.645
unclassified Candidatus Pelagibacterales genus	0.03	0.08	1.265	1.3
Candidatus Pelethenecus	0.11	2.36	0.155	0.045
Oceanospirillum	0.45	0.3	1.135	0.78
Tractidigestivibacter	2.54	0.01	0.08	0.01
Mycoplasmoides	0.43	0.03	1.825	0.35
Pseudogracilibacillus	2.13	0	0.125	0.375
Massilibacillus	2.54	0	0.01	0.025
Criibacterium	0.13	0.57	0.855	1.015
Cognataquiflexum	2.53	0.02	0.01	0
Cecembia	0.22	0	1.68	0.635
unclassified Methylophilaceae genus	1.16	0.6	0.36	0.415
Maritalea	0	0.68	1.55	0.295
unclassified Crocinitomicaceae genus	0.45	1.05	0.905	0.105
Anthropogastromicrobium	2.14	0.16	0.16	0.005
Bdellovibrio	0.37	0.05	0.495	1.53
Vaginimicrobium	1.48	0.06	0.81	0.04
unclassified Candidatus Poribacteria genus	0.29	0.14	0.845	1.115
Geovibrio	0.06	0.76	0.875	0.68
Wujia	0.01	2.34	0	0
Candidatus Avirikenella	0.06	1.42	0.235	0.585
Bisgaardia	0.86	0.52	0.24	0.675
Mannheimia	0.01	0.92	0.725	0.64
Anaeroglobus	2.29	0	0	0
Allokutzneria	0.67	0	0.315	1.285
Ornithinimicrobium	0	2.21	0.025	0.005
Enteroscipio	0	2.2	0.015	0
Defluviicoccus	0	0	1.055	1.155
Aestuariibaculum	0.38	0.1	0.935	0.785
Hafnia	0.12	0.2	0.71	1.155
Aeromicrobium	0.36	0.99	0.75	0.065
unclassified Planctomycetaceae genus	0.01	1.44	0.59	0.125
Nitrosospira	0.08	1.77	0	0.31
Tetragenococcus	0.07	0.57	1.245	0.27
Maribellus	0.04	0.04	1.12	0.95
Christiangramia	0.07	0	2.065	0
Candidatus Chrysopegis	0	0	1.88	0.25
Candidatus Avidesulfovibrio	0	0.02	1.88	0.215
Piscirickettsia	0.14	0	1.17	0.8
unclassified Helicobacteraceae genus	0.32	0.76	0.33	0.7
Fonticella	0.07	1.71	0.33	0
Desulforhopalus	0.13	0.01	1.13	0.82
unclassified Chlorobiaceae genus	0	0	1.35	0.74
Ulvibacter	0.34	1.47	0.235	0
Desulfurella	1.49	0	0.37	0.18
Ectothiorhodospira	0.58	1.18	0.18	0.085
Usitatibacter	0.09	0.11	1.095	0.73
Brenneria	0.28	0.32	0.58	0.835
Glaciimonas	0.06	0.28	0.435	1.24
Schinkia	1.79	0	0.21	0.015
unclassified Sphingomonadales genus	1.06	0.19	0.08	0.685
Citreicoccus	0.01	1.84	0.11	0.035
Isobaculum	1.52	0	0.46	0.015
Saezia	0.07	0.11	1.005	0.805
unclassified Leptospiraceae genus	1.37	0.08	0.31	0.2
Ohessyouella	0.39	0.28	0.43	0.85
Quinella	0.43	0	1.28	0.23
unclassified Aquificaceae genus	1.2	0.1	0.04	0.6
Bartonella	0.01	0.02	0.34	1.56
Candidatus Cryosericum	1.91	0	0	0
unclassified Phycisphaerae genus	0.87	0.91	0.105	0.015
unclassified Ignavibacteria genus	0.1	0.24	0.605	0.945
Desulfofarcimen	0.07	1.54	0.11	0.16
Heyndrickxia	0.33	0.3	0.45	0.8
Avibacterium	0.02	0.01	1.53	0.315
Angustibacter	0	1.47	0.4	0
unclassified Nitrobacteraceae genus	0	0	0.725	1.145
Candidatus Brocadia	0.14	0.14	0.875	0.71
Desulfobacter	1.73	0.13	0	0
Rummeliibacillus	0.65	0.77	0.435	0
unclassified Vallitaleaceae genus	0	1.23	0.545	0.08
Nitrincola	0	0	0.885	0.95
unclassified Halieaceae genus	0.15	0.86	0.55	0.26
Malaciobacter	0.35	0.33	0.355	0.775
Arabiibacter	0.01	1.77	0.01	0
unclassified Legionellales genus	0.08	0.86	0.8	0.05
unclassified Fibromonadales genus	1.74	0	0.045	0
Candidatus Scalindua	1.06	0.5	0.22	0
Jeotgalicoccus	0.9	0.28	0.315	0.285
Rhizobium	0.51	0.14	0.685	0.435
Intestinibaculum	1.58	0.05	0.12	0.015
unclassified Cytophagia genus	0.3	0.51	0.805	0.145
Raoultella	0.56	0.91	0.155	0.11
Mesoflavibacter	0.59	0.13	0.285	0.73
Aceticella	0	0	0.115	1.615
unclassified Frankiales genus	0.72	0.55	0.2	0.26
unclassified Magnetococcales genus	0	0.55	1.085	0.095
Thiothrix	0.05	1.5	0.095	0.08
unclassified Leptospirales genus	1.72	0	0	0
Methylobacillus	0.08	0.77	0.335	0.51
Urinicoccus	0.06	0.33	0.99	0.315
Caldanaerobacter	0	0.82	0.87	0
Fermentimonas	0	0	1.69	0
Thermovibrio	0.21	1.07	0.14	0.265
Arsenophonus	0.34	0.22	0.235	0.885
Enhydrobacter	1.54	0.04	0.085	0.015
unclassified Chitinophagales genus	0.56	0.66	0.425	0.03
Pseudactinotalea	0	0.39	0.765	0.515
Aquibacillus	1.31	0.26	0.035	0.06
Maridesulfovibrio	0	0.17	1.12	0.37
Moellerella	0.23	0.07	0.495	0.845
Candidatus Ventrenecus	0	0	0.54	1.09
Phosphitispora	1.12	0.02	0.085	0.4
unclassified Calditrichota genus	0.02	0.38	0.23	0.985
Sodalis	0.08	1.41	0.1	0.01
Rahnella	0.01	0	1.105	0.475
Proteiniborus	0.93	0.16	0.355	0.14
Buttiauxella	0.07	0.09	0.805	0.615
Foetidibacter	0.5	1.08	0	0
Lottiidibacillus	0	0	1.57	0
unclassified Enterobacterales genus	0.16	0.04	0.705	0.66
unclassified Candidatus Aerophobetes genus	0	1.11	0.445	0
Spirabiliibacterium	0.16	0.13	0.49	0.77
Apibacter	0.89	0.03	0.25	0.38
Catenovulum	0.31	0.01	0.305	0.905
Tatumella	0.1	0	0.565	0.865
unclassified Desulfobacteraceae genus	0	0.02	0.9	0.595
Ectobacillus	0.72	0.42	0.045	0.33
Halobacillus	0.17	0.92	0.175	0.245
Phocoenobacter	0.08	0	1.215	0.215
Herminiimonas	0.11	0.4	0.565	0.435
unclassified Candidatus Sericytochromatia genus	0.91	0.04	0.125	0.4
unclassified Erythrobacteraceae genus	0	1.47	0	0
Aggregatibacter	0.31	0.08	0.64	0.435
Candidatus Aphodocola	0.33	0.01	0.375	0.74
Pseudarthrobacter	0.79	0.32	0.345	0
unclassified Rickettsiaceae genus	0.93	0.42	0.105	0
Nautilia	0.01	0	1.365	0.075
Rodentibacter	0.04	0.72	0.245	0.44
unclassified Candidatus Pacebacteria genus	0.1	0.05	1.1	0.19
Caenimonas	1.43	0	0	0
Pseudoduganella	1.43	0	0	0
Rhodococcus	0.3	0.92	0.135	0.075
Longitalea	0	1.42	0	0
Mariniradius	0.36	0.04	0.2	0.82
unclassified Sphingobacteriaceae genus	1.42	0	0	0
Agriterribacter	0.08	1.31	0.02	0
Heliobacterium	0.08	0	1.175	0.155
Candidatus Copromonas	0.26	0	0.34	0.8
Candidatus Nardonella	0.02	0	0.44	0.94
Thermoflavifilum	0.48	0.92	0	0
Candidatus Avigastranaerophilus	1.13	0.18	0.02	0.065
Candidatus Gallimonas	1.38	0.01	0.005	0
Xanthomarina	0.65	0.6	0.025	0.115
Keratinibaculum	0.09	1.25	0.045	0
Acidilutibacter	0.2	0.4	0.415	0.345
Algibacillus	0.69	0.67	0	0
Candidatus Mcinerneyibacterium	0	1.27	0.07	0.01
Candidatus Scatosoma	0	1.11	0.07	0.15
unclassified Sphingomonadaceae genus	0.77	0.55	0.01	0
Candidatus Jettenia	0	0	1.135	0.18
unclassified candidate division Zixibacteria genus	0	0.01	1.07	0.235
Caldimonas	0.17	1.1	0.04	0
Emticicia	0.32	0.09	0.365	0.535
unclassified Chitinivibrionia genus	0.1	0.01	0.905	0.29
Tateyamaria	1.07	0.15	0	0.04
Venenivibrio	0	0	0.185	1.06
Entomomonas	0	0	0.72	0.515
Salinivibrio	0.19	0.14	0.05	0.845
Biomaibacter	0.78	0.13	0.18	0.13
unclassified Sulfurospirillaceae genus	0	0	0.34	0.875
Emcibacter	0.03	0.04	0.495	0.65
Allochromatium	1.21	0	0	0
Denitrobacterium	0	1.21	0	0
Fimbriimonas	1.21	0	0	0
Altererythrobacter	0	1.2	0	0
unclassified Candidatus Caenarcaniphilales genus	0	0	1.035	0.165
Halanaerobacter	0.91	0.26	0.005	0.015
Lebetimonas	1.11	0	0.015	0.06
Roseovarius	0.15	0.04	0.38	0.61
Candidatus Scybalousia	0.8	0.09	0.035	0.25
Chromobacterium	0.01	0	0.915	0.25
Candidatus Galligastranaerophilus	0.03	0.04	0.865	0.235
unclassified Xanthomonadales genus	0.5	0.18	0.365	0.125
Halarcobacter	0.22	0.69	0.205	0.05
Paraflavitalea	0.18	0.96	0.02	0
Ursidibacter	0.12	0.28	0.405	0.35
Tolumonas	0.01	0	0.785	0.345
Parvibacter	0	1.08	0.035	0.025
Maliibacterium	0.13	0.29	0.5	0.215
Candidatus Aphodomorpha	0.31	0.76	0.055	0
Muricoprocola	0.02	0.32	0.665	0.11
Acidocella	0.34	0	0.2	0.57
Candidatus Fimadaptatus	0	0.33	0.59	0.185
unclassified Candidatus Brocadiales genus	0.09	0	0.155	0.84
Geotoga	0.02	0.04	0.18	0.84
Smithella	0.03	0.76	0.275	0.015
unclassified Abditibacteriota genus	0	0	0.19	0.885
Thermosinus	0	0.01	0.845	0.21
Cyclobacterium	0.04	0.84	0.07	0.105
Niastella	0.73	0.32	0	0
Runella	0.53	0.3	0.05	0.165
Marixanthomonas	0.9	0.05	0.035	0.055
Cnuella	0.01	0.99	0.035	0
unclassified Candidatus Nanopelagicales genus	0.04	0.06	0.825	0.11
Fulvivirga	1.03	0	0	0
Porcincola	0	0.85	0.16	0.02
Parageobacillus	0.25	0.68	0.055	0.04
Desulfallas	1.01	0	0.015	0
Brucella	0.39	0.19	0.09	0.345
Salidesulfovibrio	0.09	0	0.79	0.135
Archangium	0.84	0.15	0.025	0
Terrimonas	0.05	0.96	0	0.005
Shigella	0.19	0.45	0.13	0.24
Haliea	0.66	0.33	0.015	0
Polyangium	0	1	0	0
Jejuia	0.47	0.01	0.115	0.395
Sulfidibacter	0.15	0.6	0.105	0.135
Nocardiopsis	0.1	0	0.205	0.675
Piscinibacter	0.02	0.95	0	0
Paucilactobacillus	0	0.02	0.635	0.31
Massilibacterium	0.48	0	0.27	0.205
Thauera	0.3	0	0.35	0.295
Deminuibacter	0	0.94	0	0
Janibacter	0	0.67	0.255	0
unclassified Deferribacteraceae genus	0	0.04	0.595	0.285
Aequorivita	0.72	0.07	0.095	0.03
Lederbergia	0.09	0.38	0.305	0.14
Mesonia	0.1	0.07	0.175	0.57
Sansalvadorimonas	0.09	0	0.135	0.69
unclassified Hymenobacteraceae genus	0.38	0.43	0.1	0
unclassified Thermomicrobiales genus	0.12	0.05	0.365	0.375
Frischella	0.03	0.84	0.01	0.02
Aurantimonas	0	0	0.065	0.835
Kiloniella	0	0	0.675	0.215
Pullulanibacillus	0.04	0.04	0.365	0.44
Tepidimicrobium	0.12	0.4	0.23	0.135
unclassified Candidatus Latescibacteria genus	0.65	0.17	0.055	0.005
Fundidesulfovibrio	0	0	0.805	0.075
Ilyomonas	0	0.88	0	0
Zavarzinella	0.51	0.32	0.035	0.01
Flavivirga	0	0.65	0.215	0.005
Candidatus Fimisoma	0.37	0.44	0.045	0.01
Fervidicella	0	0	0.855	0.01
Singulisphaera	0	0.68	0.185	0
Lientehia	0.04	0.32	0.32	0.18
Sphingopyxis	0.62	0.08	0.13	0.025
Orenia	0	0.81	0.02	0.02
unclassified Nitrospinota genus	0.4	0.33	0	0.12
Atlantibacter	0.06	0.07	0.3	0.41
Petrotoga	0.01	0.03	0.58	0.22
Thermomonas	0	0	0.82	0.02
Dethiosulfovibrio	0.15	0.12	0.3	0.26
Anaerospora	0	0	0.53	0.295
Algibacter	0.14	0.05	0.305	0.32
Thermobacillus	0	0	0.815	0
Lutimaribacter	0	0.81	0	0
Aminobacterium	0	0.68	0.09	0.035
Paracoccus	0.39	0	0.215	0.2
Ventosimonas	0	0	0.45	0.345
Lujinxingia	0	0	0.79	0
Methylocystis	0	0.79	0	0
unclassified Candidatus Aminicenantes genus	0.08	0.22	0.18	0.3
Lentibacillus	0.06	0.27	0.115	0.33
Candidatus Caccenecus	0.17	0.5	0.03	0.07
Candidatus Thioglobus	0	0.07	0.24	0.46
Candidatus Thiosymbion	0.77	0	0	0
Desulfopila	0	0	0.615	0.155
Stecheria	0	0.6	0.15	0.02
unclassified Candidatus Brocadiaceae genus	0.08	0.55	0.065	0.07
Lentimicrobium	0.64	0.06	0	0.06
Zongyanglinia	0.07	0.02	0.245	0.425
unclassified Candidatus Bipolaricaulota genus	0.54	0	0.18	0.04
Eudoraea	0.52	0.02	0.015	0.19
Desulfospira	0	0	0.61	0.135
Alkalihalobacterium	0.73	0	0	0
Bernardetia	0.07	0.09	0.365	0.205
unclassified Candidatus Levybacteria genus	0.05	0	0.175	0.505
Melissococcus	0.24	0.38	0.07	0.03
Alloiococcus	0.35	0.22	0.06	0.085
Marinitoga	0.02	0.12	0.125	0.445
Azoarcus	0	0	0.305	0.4
unclassified Pelagibacteraceae genus	0.37	0	0.025	0.31
Pseudanabaena	0	0	0.65	0.05
Roseomonas	0.09	0.48	0.13	0
Desulfoluna	0	0	0.575	0.12
Glaciecola	0.43	0.06	0.05	0.15
Paeniglutamicibacter	0.34	0.22	0.13	0
Ktedonobacter	0.69	0	0	0
Balneola	0.26	0.01	0.165	0.245
Kosmotoga	0.07	0.01	0.325	0.275
Pumilibacter	0.02	0.28	0.18	0.2
Pseudophaeobacter	0	0.01	0.575	0.095
Lucifera	0.01	0.62	0.025	0.01
Xylophilus	0.53	0.13	0.005	0
Bergeyella	0.2	0.08	0.165	0.215
Trichlorobacter	0	0.66	0	0
Cupidesulfovibrio	0	0.37	0.29	0
Herpetosiphon	0.59	0.03	0.005	0.03
Paradesulfovibrio (ex Waite et al. 2020)	0	0.04	0.485	0.13
Plantibacter	0	0	0.225	0.43
Roseibium	0.03	0	0.545	0.08
Undibacterium	0.03	0.01	0.23	0.385
unclassified Thermoanaerobacterales genus	0.27	0.06	0.27	0.05
unclassified Thermotogaceae genus	0.32	0.26	0.03	0.035
Sinobaca	0	0	0.195	0.45
unclassified Flammeovirgaceae genus	0.04	0.06	0.215	0.33
unclassified Propionibacteriales genus	0	0.61	0	0.035
Arundinibacter	0.62	0	0	0.02
Paucisalibacillus	0.42	0.02	0.1	0.1
unclassified Candidatus Peregrinibacteria genus	0.04	0.28	0.32	0
Marinicaulis	0	0.53	0.055	0.05
Actibacterium	0.06	0.11	0.21	0.255
Chiayiivirga	0.17	0.2	0.15	0.115
Desulfosudis	0.02	0.01	0.235	0.37
Syntrophus	0	0.04	0.145	0.45
unclassified Candidatus Kaiserbacteria genus	0.1	0.02	0.255	0.26
unclassified Endomicrobiia genus	0.02	0.09	0.14	0.385
Conchiformibius	0.18	0.29	0.03	0.13
Flavihumibacter	0.18	0.4	0.015	0.02
Urechidicola	0.37	0.17	0.075	0
Rhodobaca	0	0	0.56	0.05
unclassified Methylococcales genus	0.02	0	0.245	0.345
Thiomargarita	0.01	0.04	0.44	0.115
Oligoflexus	0.05	0.55	0	0
Candidatus Caldatribacterium	0	0	0.415	0.185
Shimazuella	0	0.49	0.11	0
unclassified Opitutaceae genus	0.58	0	0	0.015
Arcanobacterium	0.01	0.13	0.005	0.44
unclassified Micrococcaceae genus	0	0.43	0.155	0
Berryella	0	0.58	0	0
unclassified Eggerthellales genus	0	0.58	0	0
unclassified Phycisphaerales genus	0.36	0.06	0.15	0.01
Phaeobacter	0	0	0.505	0.07
Desulfoscipio	0.57	0	0	0
unclassified Acidimicrobiaceae genus	0.1	0.12	0.235	0.115
Necropsobacter	0.56	0	0	0
unclassified Moraxellaceae genus	0	0	0.215	0.345
Basilea	0.04	0.01	0.195	0.31
Nissabacter	0.52	0	0.01	0.02
Salinivirga	0	0.55	0	0
Tumebacillus	0	0.53	0.02	0
Bhargavaea	0.02	0.44	0.03	0.05
Candidatus Scubalenecus	0	0.06	0.1	0.375
Halalkalibaculum	0.3	0.15	0.025	0.06
Fructobacillus	0.35	0.18	0	0
Hugenholtzia	0	0.05	0.46	0.02
Tessaracoccus	0.53	0	0	0
Candidatus Muirbacterium	0.16	0.26	0.05	0.055
Demequina	0.02	0.14	0.145	0.22
Zhouia	0.06	0.06	0.31	0.095
unclassified Mycobacteriales genus	0	0.34	0.04	0.145
Aureispira	0.03	0	0.205	0.29
Cruoricaptor	0.52	0	0	0
Dactylosporangium	0	0.52	0	0
Hydrogenimonas	0.19	0.17	0.115	0.045
Marivivens	0.22	0.21	0.045	0.045
Thiomicrorhabdus	0.03	0	0.325	0.165
Aureisphaera	0	0.45	0.065	0
Pseudodesulfovibrio	0.1	0.1	0.115	0.2
unclassified Nocardioidaceae genus	0	0.43	0.08	0.005
Alteribacillus	0	0.01	0.055	0.445
Oricola	0.38	0.09	0	0.04
unclassified Candidatus Microgenomates genus	0.11	0.03	0.1	0.27
Marichromatium	0.13	0.16	0.135	0.08
Pedosphaera	0.37	0.07	0.025	0.04
Catenisphaera	0	0.5	0	0
Vogesella	0.19	0.17	0.14	0
unclassified Holophagaceae genus	0	0	0.235	0.265
Caulobacter	0	0.02	0	0.475
Thermovorax	0.04	0.27	0.035	0.15
unclassified Gemmatimonadales genus	0.11	0.37	0	0.015
Actinokineospora	0	0.49	0	0
Chengkuizengella	0.44	0.05	0	0
Hassalia	0	0.17	0.23	0.09
Margalitia	0.11	0.37	0.01	0
Petroclostridium	0.02	0	0.335	0.125
Thermomicrobium	0	0	0.405	0.075
Anaerotardibacter	0	0.48	0	0
Fuchsiella	0.41	0	0.015	0.055
unclassified Spirosomaceae genus	0.48	0	0	0
Anaerophilus	0.12	0.02	0.155	0.18
Thermoactinomyces	0.31	0.03	0.045	0.09
Metamycoplasma	0	0.23	0.17	0.07
unclassified Candidatus Falkowbacteria genus	0.13	0.01	0.15	0.18
Thalassobius	0.01	0	0.44	0.015
Bizionia	0.46	0	0	0
Wohlfahrtiimonas	0.05	0.31	0.075	0.025
Candidatus Limicola	0.06	0.06	0.275	0.06
Dolichospermum	0.11	0.21	0.135	0
Primorskyibacter	0.24	0.19	0.025	0
unclassified Candidatus Magasanikbacteria genus	0.17	0.07	0.055	0.155
Rheinheimera	0.45	0	0	0
Anaerobacillus	0.04	0.17	0.145	0.095
Euzebya	0.14	0.14	0.14	0.025
Leifsonia	0.4	0.04	0	0
Methylobacterium	0.1	0.02	0.13	0.19
unclassified Cryomorphaceae genus	0	0	0.05	0.39
unclassified Propionibacteriaceae genus	0.02	0.29	0.07	0.06
Anaerosolibacter	0.13	0.06	0.11	0.135
Candidatus Nanosynbacter	0.03	0.1	0.295	0.01
Marinobacterium	0	0	0.065	0.37
Polynucleobacter	0.01	0	0	0.425
Thalassolituus	0.1	0	0.19	0.14
Boudabousia	0	0.43	0	0
Delftia	0.3	0.13	0	0
Laspinema	0.08	0.33	0.01	0.005
Lelliottia	0	0	0.255	0.17
Pseudothermotoga	0	0	0	0.425
Erythrobacter	0	0.03	0.22	0.17
Curtobacterium	0.13	0.15	0.1	0.04
Thermicanus	0	0	0.42	0
Sulfitobacter	0	0	0.075	0.34
Kribbella	0.06	0.15	0.1	0.105
unclassified Marinilabiliaceae genus	0.3	0	0.065	0.05
Chimaeribacter	0	0	0.13	0.28
Parapedobacter	0.32	0.07	0.01	0.01
unclassified Candidatus Peribacterales genus	0	0.01	0.13	0.27
Desulfotruncus	0.12	0.22	0.07	0
Aldersonia	0	0.25	0.12	0.035
Xanthovirga	0.23	0	0.07	0.105
unclassified Rubricoccaceae genus	0.4	0	0	0
Ignatzschineria	0	0.18	0.12	0.095
Oleiphilus	0	0	0.145	0.25
Trinickia	0.05	0.09	0.15	0.105
Calorimonas	0	0.39	0	0
unclassified Alcanivoracaceae genus	0.31	0.08	0	0
unclassified Microbacteriaceae genus	0.14	0.25	0	0
Breznakiella	0	0	0.085	0.3
Fervidobacterium	0.36	0	0.025	0
Pontibaca	0	0	0.31	0.075
Sphingobium	0	0.33	0.035	0.02
Arachnia	0.38	0	0	0
Candidatus Methylumidiphilus	0.05	0.09	0.085	0.155
Desulfoprunum	0	0.02	0.27	0.085
Amphibacillus	0.01	0.35	0.01	0.005
Bovifimicola	0	0	0.36	0.015
Sutcliffiella	0	0	0.18	0.195
unclassified Gemmatimonadaceae genus	0.06	0.3	0.015	0
Pseudalgibacter	0.37	0	0	0
unclassified Rhodocyclales genus	0.03	0	0.1	0.24
Azotobacter	0.06	0.3	0.005	0
Litchfieldia	0	0	0.1	0.265
Thermoflexibacter	0.03	0.09	0.015	0.23
unclassified Marinifilaceae genus	0.1	0.22	0.035	0.01
Pelagirhabdus	0	0.36	0	0
Williamsia	0	0.31	0.02	0.03
unclassified Candidatus Wallbacteria genus	0.16	0.18	0.015	0.005
Candidatus Faecenecus	0.26	0	0	0.08
Haoranjiania	0.08	0.26	0	0
Flexistipes	0.02	0.1	0.09	0.125
Boseongicola	0.02	0.01	0.13	0.17
Ichthyobacterium	0.33	0	0	0
unclassified Caedimonadaceae genus	0.33	0	0	0
unclassified Candidatus Daviesbacteria genus	0	0.27	0.06	0
Candidatus Walczuchella	0	0	0	0.325
Deefgea	0.04	0.16	0.045	0.08
unclassified candidate division WOR-3 genus	0	0.32	0	0
Mycetocola	0.29	0	0.03	0
Desulfamplus	0.02	0.14	0.09	0.065
Reinekea	0	0.03	0.1	0.185
Superficieibacter	0	0.27	0.015	0.025
Arcicella	0.1	0	0.06	0.15
Rhodovastum	0.02	0.05	0.175	0.065
unclassified Pseudomonadales genus	0.01	0.12	0.13	0.05
unclassified Rhodobiaceae genus	0	0.08	0.23	0
Agrococcus	0	0.02	0.08	0.2
Kerstersia	0.09	0	0.07	0.14
Candidatus Magnetobacterium	0	0.3	0	0
Devosia	0	0.04	0.15	0.11
Pontiella	0	0.3	0	0
Turneriella	0.02	0.06	0	0.22
Desulfosediminicola	0.01	0	0.23	0.055
Siminovitchia	0	0.27	0.02	0.005
Deinobacterium	0.12	0.16	0.01	0
Leptospirillum	0	0.29	0	0
unclassified Bacteriovoracaceae genus	0	0.29	0	0
Reyranella	0.12	0.08	0.025	0.06
Thalassospira	0.04	0	0.14	0.105
unclassified Nitrosomonadales genus	0.06	0	0	0.225
Aliidiomarina	0.02	0	0.175	0.09
Scardovia	0	0.15	0.085	0.05
Aeribacillus	0.08	0.03	0.05	0.12
Desulfuromonas	0	0.11	0.11	0.06
Tunicatimonas	0.17	0.11	0	0
Moritella	0.05	0.02	0.075	0.13
Rouxiella	0.01	0.01	0.165	0.09
Tetrasphaera	0.04	0.2	0.035	0
Edaphobacillus	0	0.27	0	0
Tellurirhabdus	0.27	0	0	0
Grimontia	0	0	0	0.265
Natranaerofaba	0.01	0.18	0.005	0.07
Terrabacter	0.06	0.19	0.005	0.01
unclassified Candidatus Hydrogenedentes genus	0.14	0.09	0.035	0
unclassified Candidatus Margulisbacteria genus	0	0	0.265	0
Halothermothrix	0	0.25	0.005	0.005
Rufibacter	0.1	0.14	0.02	0
Seleniivibrio	0	0.02	0.155	0.085
Marinilactibacillus	0	0.11	0.065	0.08
Pelistega	0	0.25	0.005	0
Salinibacterium	0	0.07	0.17	0.015
Sporohalobacter	0	0	0.165	0.09
Sporosalibacterium	0	0	0.245	0.005
unclassified Oscillatoriales genus	0.25	0	0	0
Candidatus Spyradomonas	0	0.08	0.125	0.04
Melioribacter	0.03	0.02	0.09	0.105
Antarcticibacterium	0	0.23	0	0.01
unclassified Endomicrobiales genus	0	0.23	0.005	0.005
Allobranchiibius	0.11	0.05	0.08	0
Pseudalkalibacillus	0	0	0.225	0.015
unclassified Candidatus Auribacterota genus	0.19	0	0.05	0
unclassified Lewinellaceae genus	0.24	0	0	0
Thermotomaculum	0	0.07	0.165	0
unclassified Abditibacteriaceae genus	0.17	0.03	0.035	0
Asticcacaulis	0	0.18	0.04	0.015
Denitrificimonas	0	0.15	0.065	0.02
Kluyvera	0.01	0	0.155	0.065
Mesohalobacter	0	0.23	0	0
Pradoshia	0.01	0.07	0.06	0.09
Tepidiphilus	0	0.23	0	0
unclassified Candidatus Parcubacteria genus	0.02	0.06	0.05	0.1
Baileyella	0.02	0.21	0	0
Croceibacter	0	0.15	0.08	0
Brucepastera	0	0.04	0.12	0.065
Conservatibacter	0	0.19	0	0.035
Corallincola	0	0	0.065	0.16
Neoactinobaculum	0	0	0	0.225
Rhodocyclus	0	0	0.11	0.115
Steroidobacter	0	0	0.225	0
unclassified Candidatus Doudnabacteria genus	0.15	0	0.045	0.03
Candidatus Termititenax	0.12	0	0.03	0.075
Arsenicicoccus	0.05	0.17	0	0
Mangrovibacterium	0.07	0.1	0.035	0.015
Aridibaculum	0.11	0.11	0	0
Flavicella	0.22	0	0	0
Parafilimonas	0.06	0.16	0	0
Spiractinospora	0	0.22	0	0
unclassified Candidatus Raymondbacteria genus	0.22	0	0	0
Larkinella	0.02	0.18	0.02	0
Brachybacterium	0.04	0.13	0.045	0
Parafannyhessea	0	0.1	0.115	0
unclassified Alteromonadales genus	0	0	0.1	0.115
unclassified Myxococcales genus	0.06	0.13	0.025	0
Brevinema	0	0.16	0.035	0.015
Rhodocytophaga	0.17	0.03	0.01	0
Fibrivirga	0	0.21	0	0
Pelobium	0.21	0	0	0
Moorena	0.04	0.09	0.035	0.04
Paraneptunicella	0.14	0.04	0.02	0.005
Candidatus Roseilinea	0	0	0	0.205
Leeuwenhoekiella	0.02	0	0.165	0.015
Pediococcus	0	0.14	0.055	0.005
Salinimonas	0	0	0	0.2
Methylosarcina	0	0	0.135	0.06
Rhizorhabdus	0	0	0.135	0.06
Aristaeella	0	0.18	0.01	0
Micavibrio	0.05	0.02	0.03	0.09
Pigmentiphaga	0.09	0	0.05	0.05
unclassified Thiotrichaceae genus	0.12	0.05	0.005	0.015
Caminibacter	0.02	0.1	0.05	0.015
Planomicrobium	0.1	0.04	0.045	0
Extensimonas	0.04	0.14	0	0
Indiicoccus	0	0.18	0	0
Methylomusa	0	0.18	0	0
Syntrophorhabdus	0.03	0.04	0.055	0.055
Thermopetrobacter	0	0	0.18	0
unclassified Bryobacterales genus	0.18	0	0	0
unclassified Candidatus Marinamargulisbacteria genus	0.04	0	0.015	0.125
unclassified Syntrophales genus	0.03	0.13	0.02	0
unclassified Candidatus Wolfebacteria genus	0.02	0.02	0	0.135
Actinomadura	0.08	0.04	0.045	0.01
Candidatus Zinderia	0.04	0.11	0.01	0.015
Enterobacillus	0	0.03	0.075	0.07
Pseudoxanthomonas	0.12	0.02	0.03	0.005
Salisediminibacterium	0	0	0	0.175
unclassified Desulfuromonadales genus	0	0.06	0.095	0.02
Aestuariirhabdus	0	0.17	0	0
Alteribacter	0.05	0	0.025	0.095
Kaistia	0.01	0	0.155	0.005
unclassified Chloroflexaceae genus	0	0	0.17	0
unclassified Desulfitobacteriaceae genus	0	0	0.17	0
unclassified Hydrogenophilales genus	0.17	0	0	0
unclassified Oligoflexia genus	0.03	0.13	0.01	0
Timaviella	0	0	0.15	0.02
Aromatoleum	0	0.07	0	0.095
Mariniflexile	0.14	0	0.025	0
Thermophagus	0.02	0.05	0.06	0.035
unclassified Pirellulaceae genus	0	0	0.165	0
Nitrospina	0	0	0.12	0.045
unclassified Gloeobacteraceae genus	0.08	0.04	0.045	0
Alkalispirochaeta	0	0	0.16	0
Candidatus Ozemobacter	0.1	0	0	0.06
Crenobacter	0.07	0.09	0	0
Falseniella	0	0.05	0	0.11
Negativicoccus	0.16	0	0	0
Thermogutta	0.16	0	0	0
unclassified Sneathiellales genus	0.16	0	0	0
Alkalicella	0	0.14	0.015	0
unclassified Methylobacteriaceae genus	0	0.07	0.08	0.005
Actinoplanes	0	0	0.025	0.13
Lonepinella	0.08	0	0.075	0
Microvirgula	0.01	0.03	0.025	0.09
unclassified Methylococcaceae genus	0.03	0	0.085	0.04
Joostella	0.14	0.01	0	0
Pandoraea	0.02	0	0.05	0.08
unclassified Candidatus Brocadiia genus	0	0	0.07	0.08
unclassified candidate division CPR1 genus	0.01	0.01	0.015	0.115
Anoxybacter	0.01	0.05	0.09	0
Humidesulfovibrio	0.02	0	0.13	0
Lawsonia	0	0	0.145	0.005
Meridianimaribacter	0	0	0	0.15
Microcella	0	0.15	0	0
Yimella	0.15	0	0	0
unclassified Saprospirales genus	0	0.15	0	0
Halopseudomonas	0.02	0	0.095	0.03
Candidatus Caccalectryoclostridium	0	0	0	0.145
Chrysiogenes	0.01	0.08	0.03	0.025
Anaerohalosphaera	0	0.05	0.09	0
Cytophaga	0	0.14	0	0
Enterovibrio	0.03	0.02	0.02	0.07
Leptothrix	0	0.14	0	0
Rathayibacter	0	0.14	0	0
Salisaeta	0.14	0	0	0
Sediminibacterium	0.09	0.05	0	0
Thermovenabulum	0.05	0.09	0	0
Tsuneonella	0	0.14	0	0
unclassified Candidatus Absconditabacteria genus	0	0	0.005	0.135
Alicycliphilus	0.04	0	0.055	0.04
Atopococcus	0.02	0	0.055	0.06
Brevundimonas	0	0.03	0.105	0
Halobacteriovorax	0	0	0.115	0.02
Hippea	0	0.05	0.085	0
Methylovulum	0.03	0	0.02	0.085
unclassified Aquificota genus	0	0.09	0.03	0.015
Aquiflexum	0.11	0.01	0.01	0
Candidatus Paracaedibacter	0.06	0.01	0.005	0.055
Lacibacter	0.12	0.01	0	0
Magnetovibrio	0	0	0.125	0.005
Nitratireductor	0.08	0.05	0	0
Noviherbaspirillum	0	0.11	0.02	0
unclassified Caulobacteraceae genus	0.04	0.08	0	0.01
unclassified Ilumatobacteraceae genus	0	0.13	0	0
Caldanaerovirga	0	0	0.09	0.035
Cyanobium	0	0.11	0	0.015
unclassified Cellvibrionales genus	0	0	0.125	0
unclassified Rhodothermales genus	0.09	0	0.035	0
Bythopirellula	0.08	0.02	0	0.02
Natranaerovirga	0.01	0.01	0.07	0.03
Spiroplasma	0	0	0.07	0.05
unclassified Intrasporangiaceae genus	0.02	0.1	0	0
Aquaspirillum	0.12	0	0	0
Chlorobium	0.11	0	0.01	0
Flagellimonas	0.12	0	0	0
Methyloprofundus	0.12	0	0	0
Nonlabens	0.06	0.02	0	0.04
Robertkochia	0.12	0	0	0
unclassified Halanaerobiaceae genus	0	0.12	0	0
unclassified Thermotogota genus	0.03	0.01	0	0.08
Nitrogeniibacter	0	0	0.05	0.065
Thiomicrospira	0	0	0.07	0.045
unclassified Bernardetiaceae genus	0.01	0.02	0.04	0.045
Anaerolinea	0	0.1	0.01	0
Bacteriovorax	0	0.11	0	0
Calidifontibacillus	0	0.04	0.04	0.03
Croceivirga	0	0.11	0	0
Haploplasma	0.02	0.08	0.01	0
Lentibacter	0	0	0.11	0
Microlunatus	0	0.11	0	0
Miniphocaeibacter	0	0	0.045	0.065
Pseudarcicella	0.02	0.09	0	0
Siphonobacter	0.1	0.01	0	0
Trichormus	0	0	0	0.11
Vespertiliibacter	0	0	0	0.11
Weeksella	0.11	0	0	0
unclassified Staphylococcaceae genus	0	0.11	0	0
Geotalea	0.01	0	0.06	0.04
Altibacter	0.06	0.04	0.005	0
Azonexus	0.05	0.05	0	0.005
Limnobaculum	0.02	0.06	0.005	0.02
Litoreibacter	0.04	0.06	0	0.005
Pseudoflavitalea	0.07	0.03	0.005	0
Rivularia	0	0.03	0.025	0.05
unclassified Thermaceae genus	0	0.07	0.035	0
Heminiphilus	0	0	0.105	0
Vaginisenegalia	0	0	0.105	0
Aureivirga	0.1	0	0	0
Flaviaesturariibacter	0.02	0.08	0	0
Labilibacter	0	0.1	0	0
Lentisphaera	0.02	0.08	0	0
Melghirimyces	0	0.03	0.065	0.005
Methylibium	0	0	0.1	0
Moheibacter	0.1	0	0	0
Mycolicibacterium	0.1	0	0	0
Propioniciclava	0.03	0.06	0.005	0.005
Rappaport	0.02	0	0.05	0.03
Sphaerotilus	0.08	0.02	0	0
Taibaiella	0	0	0.1	0
Tamlana	0.1	0	0	0
Tautonia	0	0.1	0	0
unclassified Candidatus Babeliales genus	0	0	0	0.1
unclassified Longimicrobiales genus	0.1	0	0	0
unclassified Micrococcales genus	0	0.1	0	0
Candidatus Arcticimaribacter	0.09	0	0	0.01
Periweissella	0.09	0	0.01	0
Acetonema	0	0.01	0.085	0
Ihubacter	0.01	0	0.03	0.055
Lacticigenium	0	0.08	0.01	0.005
Shimwellia	0.07	0	0	0.025
Tindallia	0	0.02	0.03	0.045
unclassified Aquificales genus	0	0	0.05	0.045
Candidatus Acididesulfobacter	0.07	0.02	0	0
Cryobacterium	0	0.02	0.07	0
Dechloromonas	0	0	0.02	0.07
Pseudochelatococcus	0.01	0.07	0.005	0.005
Thermohalobacter	0	0	0.07	0.02
Candidatus Enterousia	0	0.08	0	0.01
Candidatus Formimonas	0	0.03	0.06	0
Candidatus Portiera	0	0	0.09	0
Chromatium	0	0	0.075	0.015
Edaphobacter	0	0.09	0	0
Hyalangium	0.09	0	0	0
Hyphomonas	0.09	0	0	0
Isoptericola	0.09	0	0	0
Kamptonema	0.09	0	0	0
Lamprocystis	0.09	0	0	0
Nibribacter	0.09	0	0	0
Thermorudis	0	0.09	0	0
Turicimonas	0	0	0.09	0
[truncated: 405 more rows]
