# Supplementary material
Source: Research Square preprint supplement (doi:10.21203/rs.3.rs-8441910/v1)
Supplement: Supplementary file 2 [file 0fc17ed42129ae50b018596a.docx]

**Table S2.** Comparison of α-diversity of different taxonomic units from two methods.

| Method | Taxonomic | Sample | Shannon | Simpson | SR | Pielou |
| --- | --- | --- | --- | --- | --- | --- |
| 16S rRNA | ASV | S59 | 2.296064517 | 0.774277414 | 302 | 0.402082806 |
| S62 | 2.216908321 | 0.766631939 | 271 | 0.395726758 |
| S63 | 3.078650567 | 0.877058007 | 459 | 0.502304674 |
| S64 | 1.955941562 | 0.669319728 | 254 | 0.35322801 |
| Metagenomic | Genus | S59 | 3.595706527 | 0.887223733 | 1250 | 0.504243099 |
| S62 | 3.731727229 | 0.923645868 | 1228 | 0.524624304 |
| S63 | 3.573444495 | 0.911100503 | 1268 | 0.500118461 |
| S64 | 2.920309491 | 0.828899898 | 1130 | 0.415408356 |


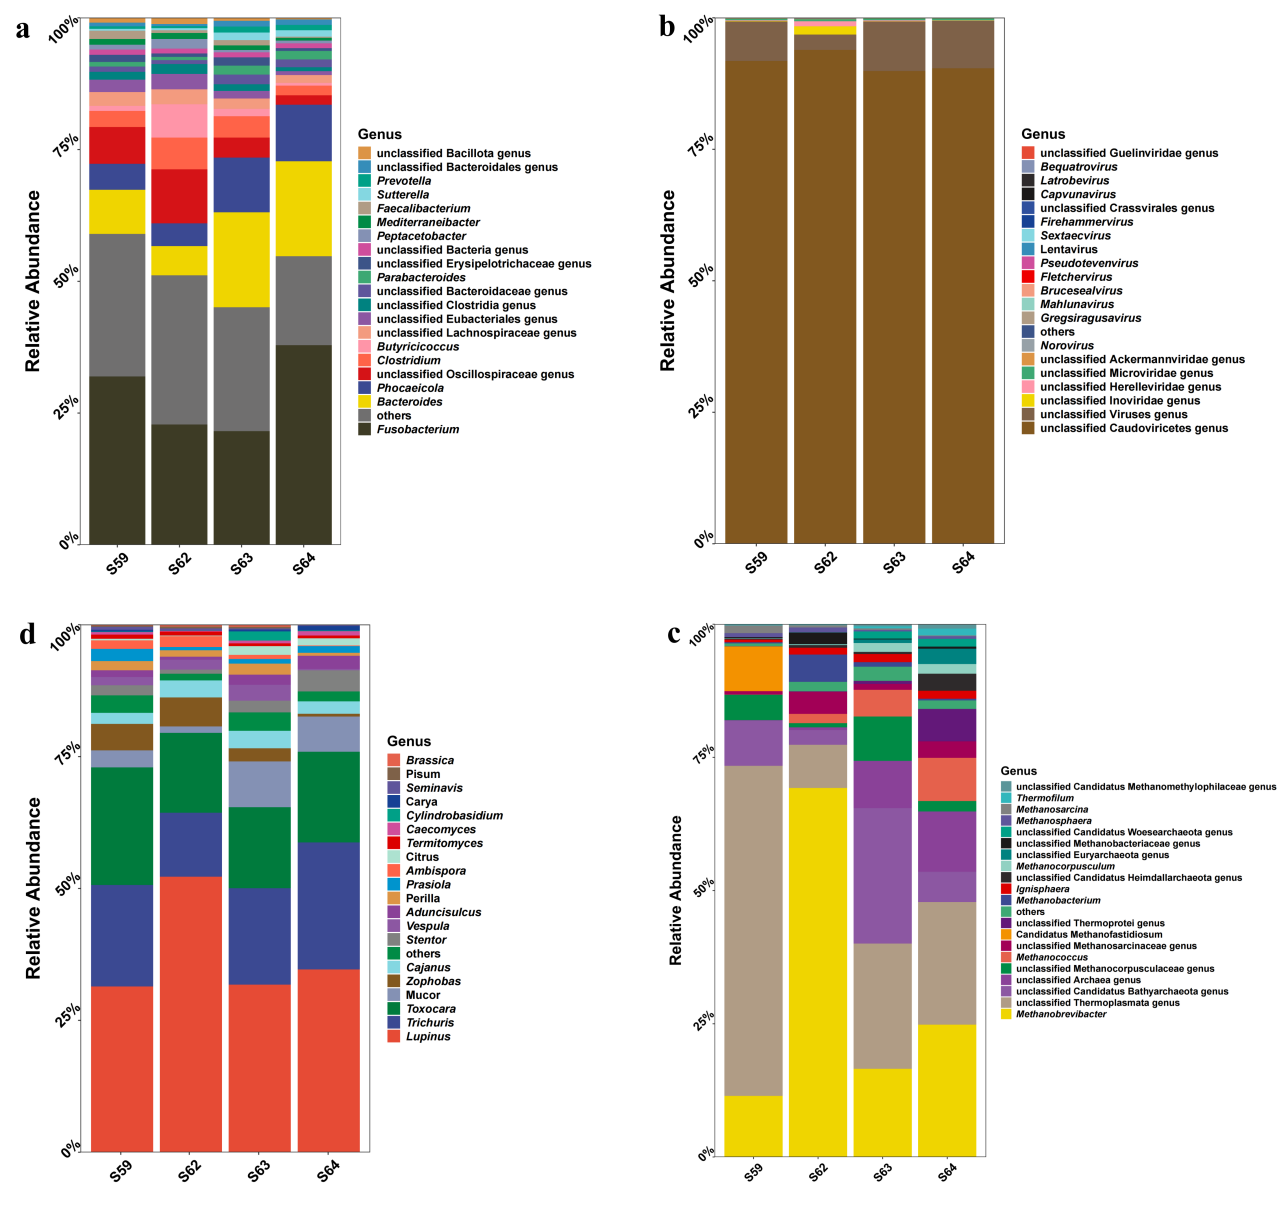


**Figure S1.** Analysis of microbial community structure and diversity across different domains revealed by metagenomic sequencing. (a) Relative abundance proportion of the top 20 bacterial genera. (b) Relative abundance proportion of the top 20 viral genera. (c) Relative abundance proportion of the top 20 eukaryotic genera. (d) Relative abundance proportion of the top 20 archaeal genera.


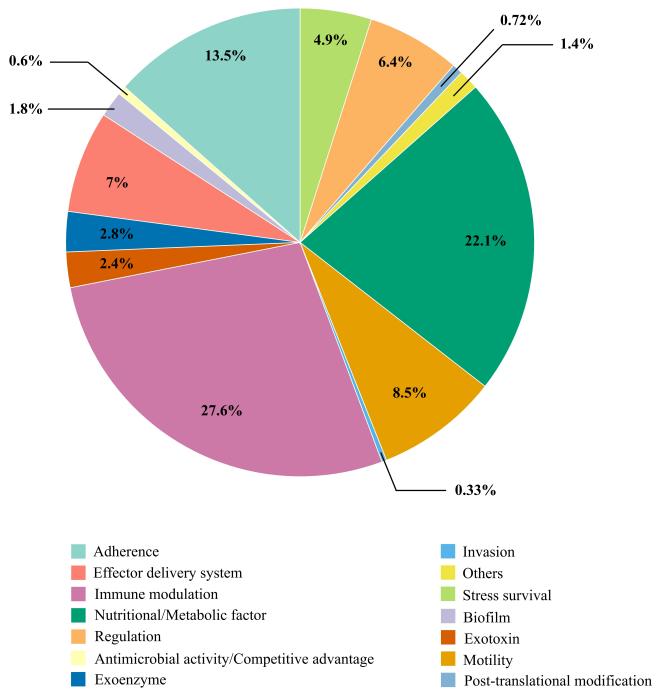


**Figure S2.** The relative abundance and the composition of VFGs.
