# Supplementary material
Source: Research Square preprint supplement (doi:10.21203/rs.3.rs-8441910/v1)
Supplement: Supplementary file 3 [file 77bbb9b8dd290dabf96a0d3e.xlsx]

## Sheet: Sheet1
taxonomy by 16S	S59	S62	S63	S64		taxonomy by metagenomic	S59	S62	S63	S64
Fusobacterium	2084	264	2173	498		Fusobacterium	196913	148490	135652	238262
Bacteroides	776	680	2368	1348		Bacteroides	51538.5	36138.4	113711	113626
Clostridium	47605	62286	30949	46958		Clostridium	18604.4	39208.2	25589.9	11514.5
unclassified Lachnospiraceae genus	2093	2624	10313	773		unclassified Lachnospiraceae genus	15948.3	18218.5	12324.7	9255.62
Faecalibacterium	3586	127	443	36		Faecalibacterium	9788.6	3430.55	6466.43	1411.92
unclassified Clostridia genus	0	0	8	0		unclassified Clostridia genus	9359.09	12423.7	7899.02	4709.02
unclassified Erysipelotrichaceae genus	1481	3149	2136	3477		unclassified Erysipelotrichaceae genus	8126.07	4065.74	9778.38	3120.41
Butyricicoccus	14	827	391	95		Butyricicoccus	6349.68	41467.3	9078.05	3351.93
Ruminococcus	21	5	75	5		Ruminococcus	6337.73	5873.21	3334.66	1580.43
Parabacteroides	4	0	0	0		Parabacteroides	5624.41	4168.37	11058.3	10238.8
Eubacterium	0	201	0	0		Eubacterium	4759.2	3661.17	4931.28	2674.8
Blautia	794	58	456	662		Blautia	4408.66	5010.43	4079.35	1402.42
Dorea	959	1857	3197	985		Dorea	3440.9	2910.39	2726.76	2702.51
Prevotella	17	25	29	4		Prevotella	3131.21	2703.63	7524.27	6403.79
Hymenobacter	65	107	79	0		Hymenobacter	2476.47	2220.35	810.85	659.81
Pseudomonas	6	5	0	0		Pseudomonas	2117.35	2294.83	851.98	535.435
Sutterella	11	14	116	8		Sutterella	2114.14	2339.82	8797.09	7610.15
Coprococcus	3	0	9	6		Coprococcus	2068.67	2301.58	1228.86	553.25
Streptococcus	100	33	5	172		Streptococcus	1362.82	1089.46	1701.38	5026.7
unclassified Clostridiaceae genus	155	605	1443	64		unclassified Clostridiaceae genus	1353.37	1684.65	967.275	419.565
Psychrobacter	74	11	8	5		Psychrobacter	1280.91	787.79	285.87	151.945
Roseburia	9	0	11	27		Roseburia	1153.83	1415.36	643.08	299.365
Anaerobiospirillum	3	6	1602	0		Anaerobiospirillum	882.99	1017.43	2128.92	2304.99
Alistipes	9	0	2	0		Alistipes	856.58	525.85	1745.27	1621.9
Paraprevotella	0	0	3	0		Paraprevotella	794.89	568.75	1776.79	1947.51
Helicobacter	0	2	39	0		Helicobacter	766.8	1467.25	2016.89	1214.53
Coprobacillus	0	26	0	2		Coprobacillus	718.26	757.94	664.955	193.23
Enterococcus	14	49	11	14		Enterococcus	659.57	1238.71	814.155	892.735
Bacillus	4	0	0	0		Bacillus	652.8	679.49	500.575	163.48
Polaromonas	35	64	4	0		Polaromonas	640.83	451.55	118.93	51.05
Desulfovibrio	7	0	8	18		Desulfovibrio	632.21	994.94	1156.69	722.875
Deinococcus	25	35	13	0		Deinococcus	615.61	411.2	206.73	152.25
unclassified Fusobacteriaceae genus	4950	5761	9246	18230		unclassified Fusobacteriaceae genus	489.68	386.21	217.665	353.04
Chryseobacterium	32	0	48	0		Chryseobacterium	423.76	143.51	208.245	132.98
Veillonella	0	0	0	4		Veillonella	369.4	368.73	296.475	220.845
Candidatus Arthromitus	102	0	14	0		Candidatus Arthromitus	352.06	57.29	59.005	35.975
Actinomyces	13	8	0	2		Actinomyces	316.3	35.28	102.21	324.07
Allobaculum	10	19	43	47		Allobaculum	310.22	454.05	284.985	169.69
Flavobacterium	9	0	13	0		Flavobacterium	288.05	28.86	52.02	52.825
Megamonas	3	5	0	0		Megamonas	270.3	126.45	302.595	188.085
unclassified Desulfovibrionaceae genus	11	3	11	4		unclassified Desulfovibrionaceae genus	245.58	108.68	1814.77	547.175
unclassified Peptostreptococcaceae genus	109	191	361	725		unclassified Peptostreptococcaceae genus	210.86	735.1	194.38	198.96
Herbaspirillum	0	3	3	0		Herbaspirillum	209.1	91	124.71	389.49
Bifidobacterium	29	21	21	0		Bifidobacterium	202.88	237.36	439	371.925
Lactobacillus	98	50	90	78		Lactobacillus	190.11	122.88	148.8	52.485
Collinsella	27	10	143	59		Collinsella	163.95	159.19	421.505	370.605
Akkermansia	31	9	14	19		Akkermansia	148.36	79.21	243.355	112.045
Peptostreptococcus	0	0	0	271		Peptostreptococcus	147.71	140.73	177.265	281.28
Porphyromonas	0	0	6	0		Porphyromonas	146.92	47.55	272.04	216.635
unclassified Gammaproteobacteria genus	9	3	0	0		unclassified Gammaproteobacteria genus	136.68	67.62	158	138.02
Mucispirillum	0	0	63	0		Mucispirillum	135.66	357.34	356.93	366.605
Odoribacter	0	6	0	3		Odoribacter	133.21	110.3	273.97	256.4
Carnobacterium	13	0	0	0		Carnobacterium	117.58	87.62	71.09	243.11
Parvimonas	0	0	0	22		Parvimonas	111.88	174.17	171.33	225.5
Enterobacter	0	0	25	0		Enterobacter	96.76	84.93	68.505	99.645
Aeromonas	0	6	10	0		Aeromonas	83.06	49.89	68.05	67.37
Pedobacter	5	0	0	0		Pedobacter	81.87	53.71	104.46	37.36
Acinetobacter	37	4	17	11		Acinetobacter	74.63	50.21	154.56	168.28
Actinobacillus	0	2	0	5		Actinobacillus	60.95	49.48	72.53	61.935
Corynebacterium	0	2	0	4		Corynebacterium	60.87	75.37	49.015	42.855
unclassified Chitinophagaceae genus	0	5	0	0		unclassified Chitinophagaceae genus	56.75	67.69	57.305	36.67
unclassified Deltaproteobacteria genus	0	4	0	0		unclassified Deltaproteobacteria genus	54.26	24.53	111.96	129.255
unclassified Betaproteobacteria genus	0	2	5	0		unclassified Betaproteobacteria genus	50.32	47.95	25.535	6.65
Elizabethkingia	0	5	0	0		Elizabethkingia	48.16	54.57	19.815	22.805
unclassified Rikenellaceae genus	8	2	4	0		unclassified Rikenellaceae genus	35.69	85.75	77.4	22.49
unclassified Coriobacteriaceae genus	0	59	0	0		unclassified Coriobacteriaceae genus	29.85	22.99	39.57	13.63
Haemophilus	0	2	0	6		Haemophilus	20.97	41.45	65.63	33.895
Bilophila	3	0	0	0		Bilophila	15.29	12.67	56.36	28.47
Citrobacter	0	16	0	0		Citrobacter	14.42	14.83	8.24	10.135
Shewanella	0	5	0	0		Shewanella	10.1	6.98	31.955	37.45
unclassified Comamonadaceae genus	21	28	8	0		unclassified Comamonadaceae genus	9.79	18.78	16.375	16.075
Gelidibacter	0	0	4	0		Gelidibacter	9.06	4.1	15.43	17.65
unclassified Rhodothermaceae genus	0	0	0	3		unclassified Rhodothermaceae genus	8.74	1.06	0.5	0.605
Ilumatobacter	0	0	3	0		Ilumatobacter	8.52	8.87	6.99	6.04
Sphingomonas	0	13	0	0		Sphingomonas	7.2	72.07	2.385	1.435
unclassified Aerococcaceae genus	0	0	4	0		unclassified Aerococcaceae genus	6.44	18.82	2.295	1.245
unclassified Neisseriaceae genus	0	0	0	6		unclassified Neisseriaceae genus	6.06	4.76	12.715	12.69
Flavisolibacter	0	4	0	0		Flavisolibacter	5.64	39.34	5.2	8.6
Luteimonas	0	0	3	0		Luteimonas	5.3	1.98	4.15	7.945
Brochothrix	15	5	2	0		Brochothrix	5.17	2.34	10.59	12.89
Lysobacter	6	0	0	0		Lysobacter	4.58	1.66	3.085	3.585
Diaphorobacter	3	0	0	5		Diaphorobacter	3.54	0.38	1.825	0.11
Rubricoccus	7	0	0	0		Rubricoccus	2.8	0.25	0.045	0.01
unclassified Oxalobacteraceae genus	0	0	3	4		unclassified Oxalobacteraceae genus	2.76	0.97	0.36	0.01
Nocardioides	3	0	4	0		Nocardioides	2.67	8.93	12.635	10.69
Arthrobacter	42	0	13	0		Arthrobacter	1.96	21.78	2.13	0.29
unclassified Rhodocyclaceae genus	0	4	0	0		unclassified Rhodocyclaceae genus	1.76	5.26	2.475	0.475
Variovorax	0	4	0	0		Variovorax	1.76	6.95	0.6	0.12
unclassified Sphingobacteriaceae genus	6	4	0	0		unclassified Sphingobacteriaceae genus	1.42	0	0	0
unclassified Xanthomonadaceae genus	0	0	7	0		unclassified Xanthomonadaceae genus	1.28	2.2	0.28	0.05
Novosphingobium	0	5	0	0		Novosphingobium	1.17	13.15	1.64	0.695
Taylorella	0	0	0	6		Taylorella	1.02	1.59	14.985	13.475
Jeotgalicoccus	0	0	5	0		Jeotgalicoccus	0.9	0.28	0.315	0.285
Phycicoccus	0	13	9	0		Phycicoccus	0.88	7.03	1.085	0.13
Marmoricola	0	6	0	0		Marmoricola	0.53	25.69	1.29	0.315
unclassified Helicobacteraceae genus	0	0	3	0		unclassified Helicobacteraceae genus	0.32	0.76	0.33	0.7
Aggregatibacter	0	0	4	5		Aggregatibacter	0.31	0.08	0.64	0.435
Rhodococcus	9	0	0	0		Rhodococcus	0.3	0.92	0.135	0.075
unclassified Enterobacteriaceae genus	62	67	52	66		unclassified Enterobacteriaceae genus	0.25	1.11	4.54	4.14
Rothia	0	3	0	0		Rothia	0.25	0	3.875	0.15
unclassified Microbacteriaceae genus	0	5	2	0		unclassified Microbacteriaceae genus	0.14	0.25	0	0
Planomicrobium	0	6	19	0		Planomicrobium	0.1	0.04	0.045	0
Rahnella	0	9	0	0		Rahnella	0.01	0	1.105	0.475
Rhodobacter	2	5	0	0		Rhodobacter	0.01	3.5	0.27	0.065
unclassified Aeromonadaceae genus	0	0	0	7		unclassified Aeromonadaceae genus	0	0	0	0
unclassified Erythrobacteraceae genus	3	0	0	0		unclassified Erythrobacteraceae genus	0	1.47	0	0
unclassified Methylobacteriaceae genus	6	0	4	0		unclassified Methylobacteriaceae genus	0	0.07	0.08	0.005
unclassified Moraxellaceae genus	18	2	4	0		unclassified Moraxellaceae genus	0	0	0.215	0.345
unclassified Nocardioidaceae genus	13	0	7	0		unclassified Nocardioidaceae genus	0	0.43	0.08	0.005
Brevundimonas	3	3	0	0		Brevundimonas	0	0.03	0.105	0
Haloferula	3	0	0	0		Haloferula	0	0.04	0	0
Salinibacterium	0	9	0	0		Salinibacterium	0	0.07	0.17	0.015
Sphingobium	10	0	0	0		Sphingobium	0	0.33	0.035	0.02
Thermomonas	0	0	20	0		Thermomonas	0	0	0.82	0.02
