# Supplementary material
Source: Research Square preprint supplement (doi:10.21203/rs.3.rs-8441910/v1)
Supplement: Supplementary file 4 [file bdaa470af33fbd95456aaced.xlsx]

## Sheet: Sheet1
taxonomy	S59	S62	S63	S64
Unclassified	99	110	166	133
c__Betaproteobacteria;o__Unclassified	0	2	5	0
c__Clostridia;o__Unclassified	0	0	8	0
c__Deltaproteobacteria;o__Unclassified	0	4	0	0
c__Gammaproteobacteria;o__Unclassified	9	3	0	0
c__TM7-3;o__Unclassified	0	3	0	0
f__Aerococcaceae;f__Unclassified	0	0	4	0
f__Aeromonadaceae;g__Unclassified	0	0	0	7
f__C111;g__Unclassified	0	0	3	0
f__Chitinophagaceae;g__Unclassified	0	5	0	0
f__Clostridiaceae;g__Unclassified	155	605	1443	64
f__Comamonadaceae;g__Unclassified	21	28	8	0
f__Coriobacteriaceae;g__Unclassified	0	59	0	0
f__Desulfovibrionaceae;g__Unclassified	11	3	11	4
f__Ellin5301;g__Unclassified	0	5	0	0
f__Enterobacteriaceae;g__Unclassified	62	67	52	66
f__Erysipelotrichaceae;g__Unclassified	1481	3149	2136	3477
f__Erythrobacteraceae;g__Unclassified	3	0	0	0
f__Fusobacteriaceae;g__Unclassified	4950	5761	9246	18230
f__Helicobacteraceae;g__Unclassified	0	0	3	0
f__Jonesiaceae;g__Unclassified	3	0	0	0
f__Lachnospiraceae;g__Unclassified	2093	2624	10313	773
f__Legionellaceae;g__Unclassified	6	0	0	0
f__Listeriaceae;g__Unclassified	0	4	0	0
f__Methylobacteriaceae;g__Unclassified	6	0	4	0
f__Microbacteriaceae;g__Unclassified	0	5	2	0
f__Moraxellaceae;g__Unclassified	18	2	4	0
f__Neisseriaceae;g__Unclassified	0	0	0	6
f__Nocardiaceae;g__Unclassified	0	3	0	0
f__Nocardioidaceae;g__Unclassified	13	0	7	0
f__Oxalobacteraceae;g__Unclassified	0	0	3	4
f__Patulibacteraceae;g__Unclassified	0	3	0	0
f__Peptostreptococcaceae;g__Unclassified	109	191	361	725
f__Rhodocyclaceae;g__Unclassified	0	4	0	0
f__Rhodothermaceae;g__Unclassified	0	0	0	3
f__Rikenellaceae;g__Unclassified	8	2	4	0
f__Ruminococcaceae;g__Unclassified	5329	5759	2243	561
f__S24-7;g__Unclassified	82	78	73	55
f__Sphingobacteriaceae;g__Unclassified	6	4	0	0
f__Xanthomonadaceae;g__Unclassified	0	0	7	0
g__02d06	0	0	22	2
g__Acinetobacter	37	4	17	11
g__Actinobacillus	0	2	0	5
g__Actinomyces	13	8	0	2
g__Aeromonas	0	6	10	0
g__Aggregatibacter	0	0	4	5
g__Akkermansia	31	9	14	19
g__Alistipes	9	0	2	0
g__Allobaculum	10	19	43	47
g__Amorphomonas	0	0	0	3
g__Anaerobiospirillum	3	6	1602	0
g__Arthrobacter	42	0	13	0
g__Bacillus	4	0	0	0
g__Bacteroides	776	680	2368	1348
g__Bifidobacterium	29	21	21	0
g__Bilophila	3	0	0	0
g__Blautia	794	58	456	662
g__Brevundimonas	3	3	0	0
g__Brochothrix	15	5	2	0
g__Butyricicoccus	14	827	391	95
g__Candidatus Arthromitus	102	0	14	0
g__Carnobacterium	13	0	0	0
g__Chryseobacterium	32	0	48	0
g__Citrobacter	0	16	0	0
g__Clostridium	47605	62286	30949	46958
g__Collinsella	27	10	143	59
g__Coprobacillus	0	26	0	2
g__Coprococcus	3	0	9	6
g__Corynebacterium	0	2	0	4
g__Deinococcus	25	35	13	0
g__Desulfovibrio	7	0	8	18
g__Diaphorobacter	3	0	0	5
g__Dorea	959	1857	3197	985
g__Elizabethkingia	0	5	0	0
g__Enterobacter	0	0	25	0
g__Enterococcus	14	49	11	14
g__Eubacterium	0	201	0	0
g__Faecalibacterium	3586	127	443	36
g__Flavisolibacter	0	4	0	0
g__Flavobacterium	9	0	13	0
g__Frigoribacterium	12	0	0	0
g__Fusobacterium	2084	264	2173	498
g__Gelidibacter	0	0	4	0
g__Gluconacetobacter	0	0	3	0
g__Haemophilus	0	2	0	6
g__Haloferula	3	0	0	0
g__Helicobacter	0	2	39	0
g__Herbaspirillum	0	3	3	0
g__Hymenobacter	65	107	79	0
g__Ilumatobacter	0	0	3	0
g__Jeotgalicoccus	0	0	5	0
g__Kaistobacter	0	0	4	0
g__Lactobacillus	98	50	90	78
g__Luteimonas	0	0	3	0
g__Luteolibacter	3	0	0	0
g__Lysobacter	6	0	0	0
g__Marmoricola	0	6	0	0
g__Megamonas	3	5	0	0
g__Mucispirillum	0	0	63	0
g__Nocardioides	3	0	4	0
g__Novosphingobium	0	5	0	0
g__Odoribacter	0	6	0	3
g__Oscillospira	522	3	68	26
g__Parabacteroides	4	0	0	0
g__Paraprevotella	0	0	3	0
g__Parvimonas	0	0	0	22
g__Pedobacter	5	0	0	0
g__Peptostreptococcus	0	0	0	271
g__Phycicoccus	0	13	9	0
g__Planomicrobium	0	6	19	0
g__Polaromonas	35	64	4	0
g__Porphyromonas	0	0	6	0
g__Prevotella	17	25	29	4
g__Pseudomonas	6	5	0	0
g__Psychrobacter	74	11	8	5
g__Rahnella	0	9	0	0
g__Rhodobacter	2	5	0	0
g__Rhodococcus	9	0	0	0
g__Roseburia	9	0	11	27
g__Rothia	0	3	0	0
g__Rubricoccus	7	0	0	0
g__Ruminococcus	21	5	75	5
g__SMB53	0	0	18	12
g__Saccharibacter	10	0	0	0
g__Salinibacterium	0	9	0	0
g__Sanguibacter	8	0	0	0
g__Shewanella	0	5	0	0
g__Sphingobium	10	0	0	0
g__Sphingomonas	0	13	0	0
g__Streptococcus	100	33	5	172
g__Sutterella	11	14	116	8
g__Taylorella	0	0	0	6
g__Thermomonas	0	0	20	0
g__Variovorax	0	4	0	0
g__Veillonella	0	0	0	4
g__Xanthobacter	8	0	0	0
o__Actinomycetales;f__Unclassified	0	0	0	27
o__Bacillales;f__Unclassified	0	0	5	0
o__Bacteroidales;f__Unclassified	24	5	21	7
o__Burkholderiales;f__Unclassified	0	0	0	3
o__Clostridiales;f__Unclassified	376	486	1867	1459
o__Fusobacteriales;f__Unclassified	20	0	3	22
o__Lactobacillales;f__Unclassified	9	0	2	0
o__Legionellales;f__Unclassified	3	0	0	0
o__RF39;f__Unclassified	75	0	30	15
o__Rhizobiales;f__Unclassified	15	2	0	0
o__SC-I-84;f__Unclassified	0	0	5	0
p__Bacteroidetes;c__Unclassfied	0	5	0	0
p__Firmicutes;c__Unclassified	0	20	2	67
