# Supplementary material
Source: Research Square preprint supplement (doi:10.21203/rs.3.rs-8441910/v1)
Supplement: Supplementary file 5 [file fd9239b97193a549983d6d5d.xlsx]

## Sheet: Sheet1
phylum	S59	S62	S63	S64
Bacillota	264724	374980	212090	112277
Fusobacteriota	205834	155221	141383	248216
Bacteroidota	114372	89125.3	233110	229542
Pseudomonadota	14731.5	13381.4	22464.6	20555.1
unclassified Bacteria phylum	6273.56	6008.37	6113.3	5771.93
Actinomycetota	2243.24	2535.99	3505.07	5551.74
Campylobacterota	1205.8	2872.05	2567.88	1614.58
Thermodesulfobacteriota	1076.34	1288.84	3290.32	1482.79
Spirochaetota	1771.57	1244.82	1419.27	606.69
Planctomycetota	441.73	449.15	827.515	924.97
Mycoplasmatota	460.61	548.44	515.31	215.915
Deinococcota	616.21	465.05	219.335	153.975
Deferribacterota	151.71	377.49	364.305	372.43
Acidobacteriota	188.09	407.99	313.735	275.88
Verrucomicrobiota	253.78	164.93	351.88	176.865
Lentisphaerota	251.28	251.02	161.89	152.94
Cyanobacteriota	347.2	191.8	94.04	182.925
Chloroflexota	188.36	136.07	102.36	174.16
Thermotogota	125.07	48.08	121.265	257.35
Fibrobacterota	105.34	77.81	58.96	46.695
Synergistota	102.23	80.7	52.975	21.125
Candidatus Melainabacteria	77.54	37.39	37.515	20.51
Armatimonadota	43.64	25.64	38.915	41.35
Kiritimatiellota	91.41	20.28	28.32	7.495
Candidatus Saccharibacteria	53.76	21.42	34.31	24.345
Bdellovibrionota	16.9	32.01	39.95	41
Candidatus Omnitrophota	33.71	37.59	23.895	26.705
Chlamydiota	27.55	45.97	29.175	11.77
Elusimicrobiota	32.97	35.15	28.235	13.36
Candidatus Delongbacteria	14.16	17.15	29.12	33.755
Candidatus Kerfeldbacteria	3.8	79.11	6.62	3.55
Nitrospirota	35.84	8.05	27.31	21.425
Candidatus Marinimicrobia	10.4	38	19.205	8.07
candidate division WWE3	54.77	0	0	0
Rhodothermota	34.64	3.14	0.775	0.66
Ignavibacteriota	16.12	3.82	11.315	7.92
Myxococcota	15.35	8.22	4.72	3.295
Dictyoglomota	0	24.35	0	0
Candidatus Cloacimonadota	1.65	3.08	10.06	4.43
Aquificota	2.49	1.94	6.54	5.615
Atribacterota	4.86	0.24	5.29	2.56
Candidatus Riflebacteria	4.58	0.97	6.15	1.195
Chlorobiota	0.56	6.95	2.65	0.99
Candidatus Roizmanbacteria	9.69	0.64	0.06	0.72
Gemmatimonadota	0.96	1.61	5.08	3.01
Candidatus Dadabacteria	0.78	1.06	6.31	1.455
Candidatus Hydrothermae	4.35	0.8	2.05	0.34
Coprothermobacterota	0.31	0.69	2.78	2.275
Candidatus Eremiobacterota	2.83	2.06	0.765	0.355
Candidatus Woesebacteria	0.07	0	1.785	3.235
Calditrichota	2.58	0.41	0.385	1.11
Candidatus Sumerlaeota	3.84	0.04	0.23	0.01
Candidatus Staskawiczbacteria	0	3.88	0.005	0
Candidatus Gracilibacteria	0.28	0.71	1.22	1.135
Candidatus Krumholzibacteriota	2.34	0	0.075	0.83
Caldisericota	0.02	2.07	0.37	0.545
Candidatus Moranbacteria	0.06	0.05	0.63	2.16
Candidatus Nomurabacteria	0.01	0.07	1.69	1.04
Candidatus Poribacteria	0.29	0.14	0.845	1.115
Candidatus Kryptonia	0	0	1.88	0.25
Candidatus Cryosericota	1.91	0	0	0
Thermomicrobiota	0.2	0.14	0.77	0.45
Candidatus Aerophobetes	0	1.11	0.445	0
Candidatus Pacebacteria	0.1	0.05	1.1	0.19
Candidatus Mcinerneyibacteriota	0	1.27	0.07	0.01
Balneolota	0.6	0.22	0.19	0.305
candidate division Zixibacteria	0	0.01	1.07	0.235
Abditibacteriota	0.17	0.03	0.225	0.885
Candidatus Peregrinibacteria	0.04	0.29	0.45	0.27
Nitrospinota	0.4	0.33	0.12	0.165
Candidatus Latescibacteria	0.65	0.17	0.055	0.005
Candidatus Aminicenantes	0.08	0.22	0.18	0.3
Candidatus Bipolaricaulota	0.54	0	0.18	0.04
Candidatus Levybacteria	0.05	0	0.175	0.505
Candidatus Margulisbacteria	0.16	0	0.31	0.2
Candidatus Kaiserbacteria	0.1	0.02	0.255	0.26
Candidatus Muirbacteria	0.16	0.26	0.05	0.055
Candidatus Microgenomates	0.11	0.03	0.1	0.27
Candidatus Falkowbacteria	0.13	0.01	0.15	0.18
Candidatus Magasanikbacteria	0.17	0.07	0.055	0.155
Candidatus Wallbacteria	0.16	0.18	0.015	0.005
Candidatus Daviesbacteria	0	0.27	0.06	0
candidate division WOR-3	0	0.32	0	0
Candidatus Hydrogenedentes	0.14	0.09	0.035	0
Candidatus Auribacterota	0.19	0	0.05	0
Candidatus Parcubacteria	0.02	0.06	0.05	0.1
Candidatus Doudnabacteria	0.15	0	0.045	0.03
Candidatus Raymondbacteria	0.22	0	0	0
Candidatus Wolfebacteria	0.02	0.02	0	0.135
candidate division CPR1	0.01	0.01	0.015	0.115
Chrysiogenota	0.01	0.08	0.03	0.025
Candidatus Absconditabacteria	0	0	0.005	0.135
Candidatus Kapabacteria	0.07	0	0	0
Candidatus Gottesmanbacteria	0	0	0.065	0
Candidatus Pyropristinus	0.02	0	0.025	0.015
candidate division NC10	0.06	0	0	0
Candidatus Curtissbacteria	0	0	0	0.04
Candidatus Dormibacteraeota	0	0	0.04	0
Candidatus Liptonbacteria	0	0	0.035	0
Candidatus Uhrbacteria	0	0	0.03	0
Candidatus Blackallbacteria	0	0	0	0.02
Candidatus Edwardsbacteria	0	0	0	0
Candidatus Eisenbacteria	0	0	0	0
Candidatus Nealsonbacteria	0	0	0	0
Candidatus Rokubacteria	0	0	0	0
Candidatus Taylorbacteria	0	0	0	0
